# Supplementary material for: Stearoyl-CoA Desaturase-Mediated Monounsaturated Fatty Acid Availability Supports Humoral Immunity
Source: PubMed Central journal article supplement — Cell Rep. Author manuscript; Available in PMC 2021 Jan 27. (PMC7839063; doi:10.1016/j.celrep.2020.108601), 2021-01-05
Supplement: NIHMS1660510-supplement-1.pdf [file NIHMS1660510-supplement-1.pdf]

**Cell Reports, Volume 34**

**Supplemental Information**

**Stearoyl-CoA Desaturase-Mediated Monounsaturated**

**Fatty Acid Availability Supports Humoral Immunity**

**Xian Zhou, Xingxing Zhu, Chaofan Li, Yanfeng Li, Zhenqing Ye, Virginia Smith Shapiro, John A. Copland III, Taro Hitosugi, David A. Bernlohr, Jie Sun, and Hu Zeng**



**Figure S2, related to Figure 2**

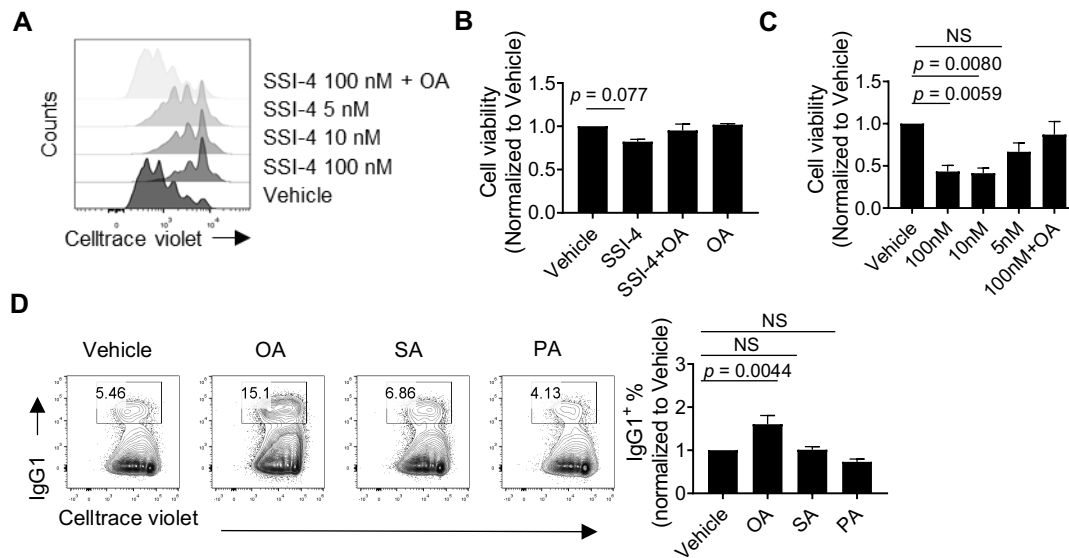

**Figure S2. MUFAs promote B cell proliferation and survival in vitro, related to Figure 2**

(A) Cell proliferation of murine B cells stimulated with LPS/IL-4/IL-5 in presence of 5, 10, and 100 nM SSI-4, or 100 nM SSI-4 plus OA. (B) The cell viability of murine B cells activated with LPS/IL-4 in the presence of vehicle, 100 nM SSI-4, SSI-4 plus OA, and OA alone for 48 h. (C) The cell viability of murine B cells activated with LPS/IL-4 in presence of different doses of SSI-4, or SSI-4 plus exogenous OA for 72 h. (D) Flow cytometry analysis of murine B cell proliferation and class switch when treated with OA, SA and PA. Right, the frequencies of IgG1<sup>+</sup> B cell activated with LPS/IL-4 in presence of OA, PA and SA. The percentages were normalized to vehicle (BSA) group. *p* value was calculated with one-way ANOVA (B-D). NS, not significant. Results were representative of 3 (A) and pooled from 4 (B-D) independent experiments. Error bars represent SEM.

**Figure S3, related to Figure 3**

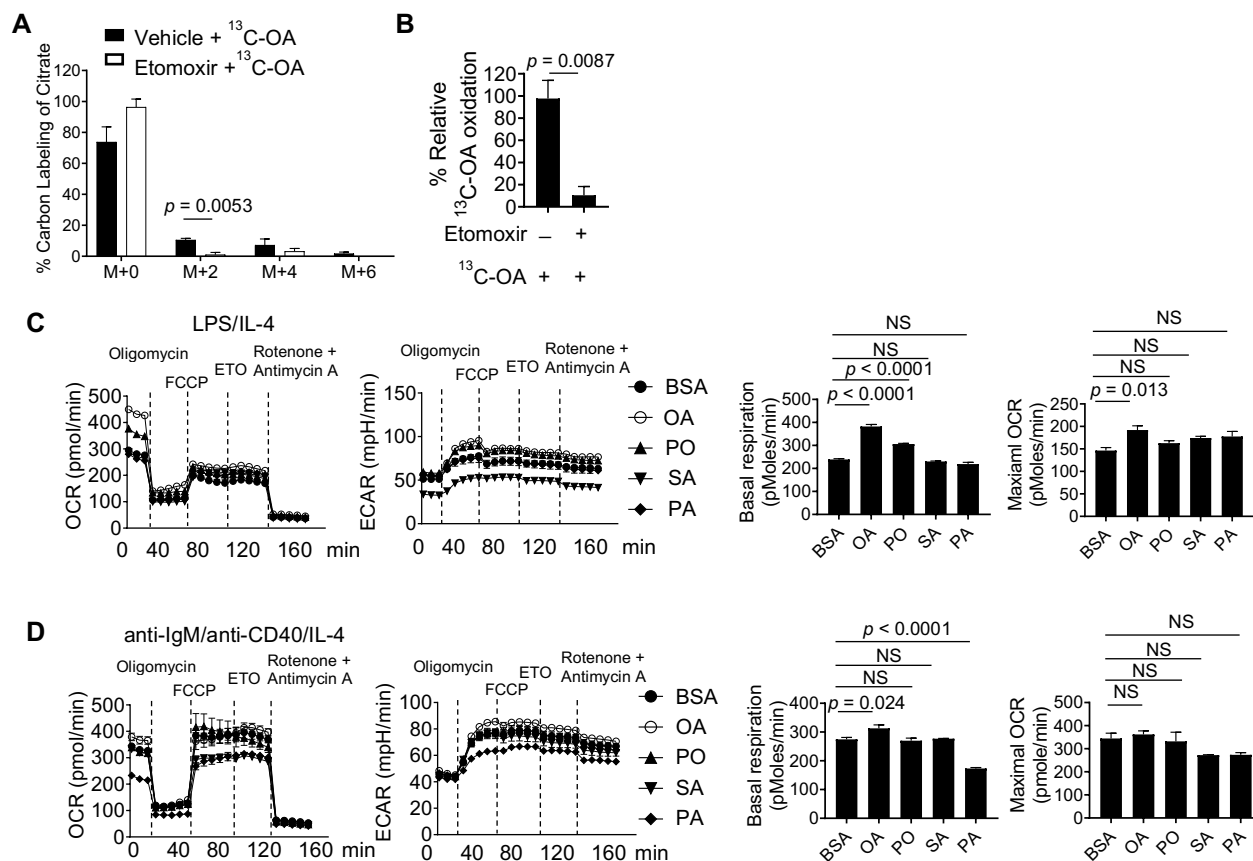

**Figure S3. MUFAs maintains B cell metabolic fitness, related to Figure 3**

(A, B) The U-<sup>13</sup>C-OA tracing assay on murine activated B cells. (A) Isotopomer tracing of U-<sup>13</sup>C-OA in activated B cells. (A) The conversion of U-<sup>13</sup>C-OA to [M + 2, 4, 6]-<sup>13</sup>C labeled citrate, with or without etomoxir treatment. (B) The summary of percentage of relative U-<sup>13</sup>C-OA oxidation (normalized to etomoxir untreated sample). (C, D) Oxygen consumption rate (OCR) was measured with a Seahorse XFe96 analyzer using LPS/IL-4 (C) and anti-IgM/anti-CD40/IL-4 (D) activated murine B cells in the presence of BSA, OA, PO, SA and PA for 48 h with a MitoStress assay kit. Basal respiration and maximal OCR of either stimulation were summarized. *p* value was calculated with Student's *t* test (A, B) and one-way ANOVA (C, D). NS, not significant. Data were representative of 3 (C) and 2 (D) independent experiments. Error bars represent SEM.

**Figure S4, related to Figure 4**

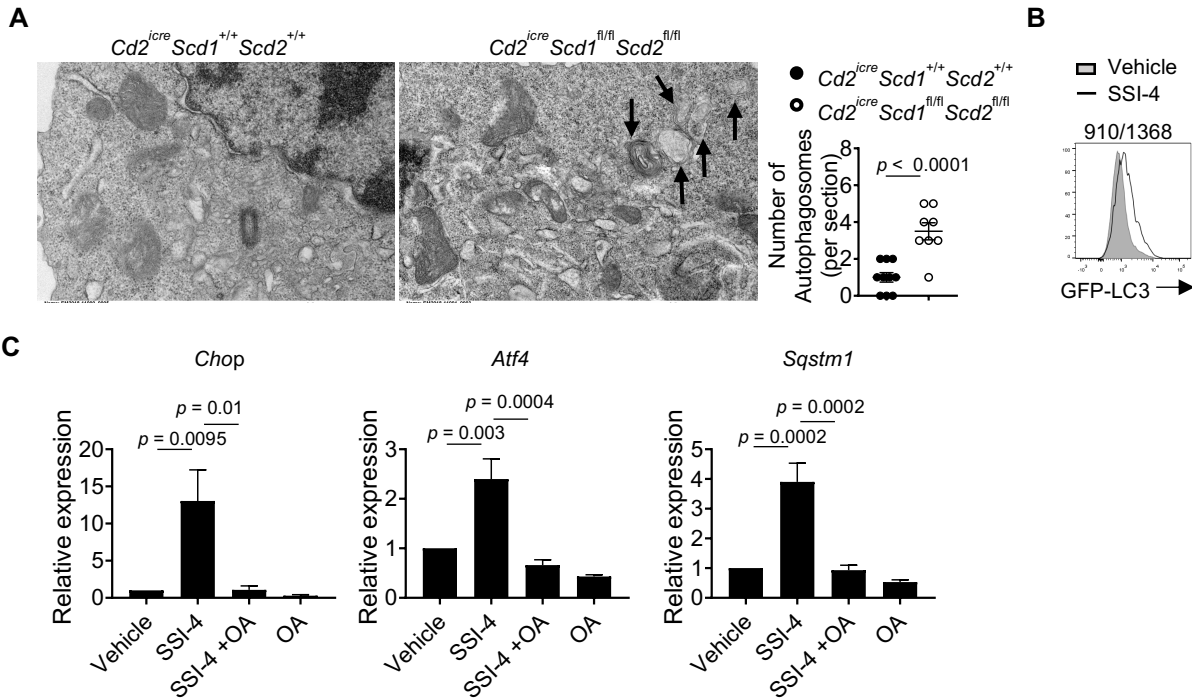

**Figure S4. MUFAs prevent overactivation of autophagy and ER stress, related to Figure 4**  
 (A) B cells isolated from  $Cd2^{iCre} Scd1^{+/+} Scd2^{+/+}$  and  $Cd2^{iCre} Scd1^{fl/fl} Scd2^{fl/fl}$  mice were activated with LPS/IL-4 for 48 h. They were imaged on transmission electron microscope. Right, numbers of autophagosomes (per section) found in B cells from  $Cd2^{iCre} Scd1^{+/+} Scd2^{+/+}$  mouse ( $n = 10$ ) and those from  $Cd2^{iCre} Scd1^{fl/fl} Scd2^{fl/fl}$  mouse ( $n = 8$ ). (B) Flow cytometry analysis of GFP-LC3 expression in activated B cells isolated from GFP-LC3 reporter mouse treated with vehicle, and SSI-4. Numbers indicate the mean fluorescence intensity (MFI) of GFP. (C) RT-PCR analysis of *Chop*, *Atf4*, and *Sqstm1* in activated B cells in the presence of vehicle, SSI-4, SSI-4 plus OA, or OA alone.  $p$  value was calculated with Student  $t$ -test (A) and one-way ANOVA (C). Data were representative of 2 (A, B) experiments, or were pooled from 3 (C) independent experiments. Error bars represent SEM.

**Figure S5, related to Figure 5**

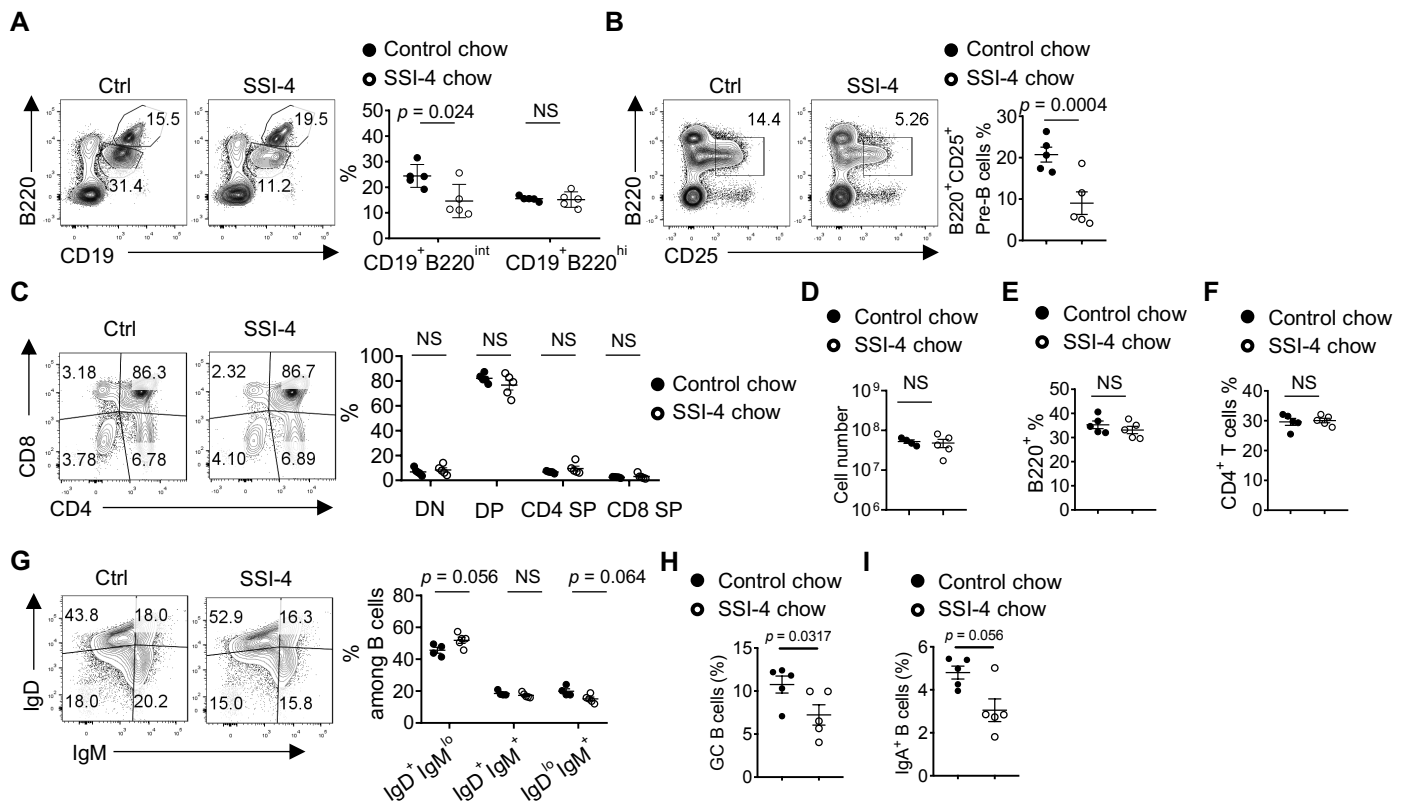

**Figure S5. SCD activity supports B cell development and immunization induced humoral immune response, related to Figure 5**

(A) Flow cytometry analysis of B cell precursors (B220<sup>int</sup>CD19<sup>+</sup>) and circulating mature B cells (B220<sup>hi</sup>CD19<sup>+</sup>) in bone marrow from mice fed with control chow or SSI-4 chow. Right, frequencies of B cell precursors and circulating mature B cells. (B) Flow cytometry of pre-B cell (B220<sup>+</sup>CD25<sup>+</sup>) in bone marrow from mice fed with control chow or SSI-4 chow. Right, frequencies of pre-B cells. (C) Flow cytometry analysis of thymic CD4<sup>-</sup>CD8<sup>-</sup> (DN), CD4<sup>+</sup>CD8<sup>+</sup> (DP), CD4<sup>+</sup> single positive (SP) and CD8<sup>+</sup> SP T cells from mice fed with control chow or SSI-4 chow. Right, the frequencies of DP, DN, CD4<sup>+</sup> and CD8<sup>+</sup> SP T cells. (D-F) Mice were fed with control chow or SSI-4 chow for 2 weeks. The total splenic cellularity (D), and percentages of splenic B220<sup>+</sup> B cells (E), and CD4<sup>+</sup> T cells (F). (G) Flow cytometry analysis of IgM<sup>lo</sup>IgD<sup>+</sup> (mature B), IgM<sup>+</sup>IgD<sup>+</sup>, and IgM<sup>+</sup>IgD<sup>lo</sup> B cells among splenic CD19<sup>+</sup> B cells. Right, the frequencies of each B cell subsets. (H, I) The frequencies of GC B cells (H) and IgA expression (I) among total B cells in Peyer's patches from mice fed with control or SSI-4 chow. *p* value was calculated with Student *t*-test (A-I). Data were representative of 2 (A-I) independent experiments. Error bars represent SEM.

## Figure S6, related to Figure 7

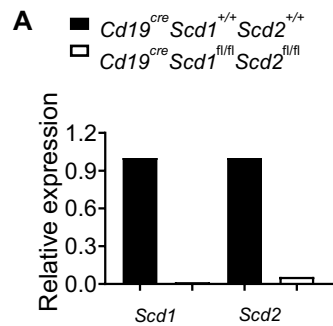

## Figure S6. B cell intrinsic SCD activity is dispensable for humoral immunity *in vivo*, related to Figure 7

(A) RT-PCR analysis of *Scd1*, and *Scd2* expression in murine splenic B cells isolated from WT and  $Cd19^{Cre} Scd1^{fl/fl} Scd2^{fl/fl}$  mice.

**Table S1. The concentrations of non-esterified free fatty acids (NEFA) were measured in 8 weeks old male (n = 5) and female (n = 8) mice sera, related to Figure 2**

| Non-esterified free fatty acids (NEFA) | Concentration ( $\mu\text{M}$ , Mean $\pm$ SD) |                 |
|----------------------------------------|------------------------------------------------|-----------------|
|                                        | Male (n = 5)                                   | Female (n = 8)  |
| EPA                                    | 3.08 $\pm$ 0.83                                | 4.44 $\pm$ 0.56 |
| Linolenic acid                         | 26.3 $\pm$ 3.74                                | 44.6 $\pm$ 12.7 |
| DHA                                    | 18.6 $\pm$ 2.94                                | 23 $\pm$ 3.5    |
| Myristic acid                          | 5.69 $\pm$ 1.2                                 | 7.55 $\pm$ 2.17 |
| Palmitoleic acid                       | 32.8 $\pm$ 2.543                               | 31.7 $\pm$ 5.53 |
| Arachidonic acid                       | 10.1 $\pm$ 0.77                                | 14.8 $\pm$ 1.24 |
| Linoleic acid                          | 221 $\pm$ 20.1                                 | 304 $\pm$ 74    |
| Palmitic acid                          | 222 $\pm$ 5.97                                 | 239 $\pm$ 26.1  |
| Oleic acid                             | 162 $\pm$ 18.2                                 | 184 $\pm$ 37.9  |
| Stearic acid                           | 44.7 $\pm$ 5.01                                | 53.8 $\pm$ 8.39 |



**Table S2. Primers for RT-PCR are listed below, related to STAR Methods**

| <b>Gene names</b> | <b>Species</b> | <b>Sequences</b>                                                      |
|-------------------|----------------|-----------------------------------------------------------------------|
| <i>Scd1</i>       | Murine         | F 5'-TTCTTGCGATACACTCTGGTGC-3'<br>R 5'-CGGGATTGAATGTTCTTGTCGT-3'      |
| <i>Scd2</i>       | Murine         | F 5'-GCATTTGGGAGCCTTGACG-3'<br>R 5'-AGCCGTGCCTTGATGTTCTG-3'           |
| <i>Fasn</i>       | Murine         | F 5'-GGAGGTGGTGATAGCCGGTAT-3'<br>R 5'-TGGTAATCCATAGAGCCCAG-3'         |
| <i>Acaca</i>      | Murine         | F 5'-GTCCCCAGGGATGAACCAATA-3'<br>R 5'-GCCATGCTCAACCAAAGTAGC-3'        |
| <i>Chop</i>       | Murine         | F 5'-CTGGAAGCCTGGTATGAGGAT-3'<br>R 5'-CAGGGTCAAGAGTAGTGAAGGT-3'       |
| <i>Atf4</i>       | Murine         | F 5'-GGGTTCTGTCTTCCACTCCA-3'<br>R 5'-AAGCAGCAGAGTCAGGCTT-3'           |
| <i>Sqstm1</i>     | Murine         | F 5'-AGGATGGGGACTTGGTTGC-3'<br>R 5'-TCACAGATCACATTGGGGTGC-3'          |
| <i>SCD</i>        | Human          | F 5'-AGTTCTACACCTGGCTTTGG-3'<br>R 5'-GTTGGCAATGATCAGAAAGAGC-3'        |
| <i>ACACA</i>      | Human          | F 5'-GATATCCCAGAGATGTTTCGGC-3'<br>R 5'-GTCAGCATGTCAGAAGGCAGAG-3'      |
| <i>FASN</i>       | Human          | F 5'-AGAACTTGCAAGGAGTTCTGGGACA-3'<br>R 5'-TCCGAAGAAGGAGGCATCAAACCT-3' |
