# Supplementary material for: Stearoyl-CoA Desaturase-Mediated Monounsaturated Fatty Acid Availability Supports Humoral Immunity
Source: PubMed Central journal article supplement — Cell Rep. Author manuscript; Available in PMC 2021 Jan 27. (PMC7839063; doi:10.1016/j.celrep.2020.108601), 2021-01-05
Supplement: NIHMS1660510-supplement-2.pdf [file NIHMS1660510-supplement-2.pdf]

# Stearoyl-CoA Desaturase-Mediated Monounsaturated Fatty Acid Availability Supports Humoral Immunity

## Graphical Abstract

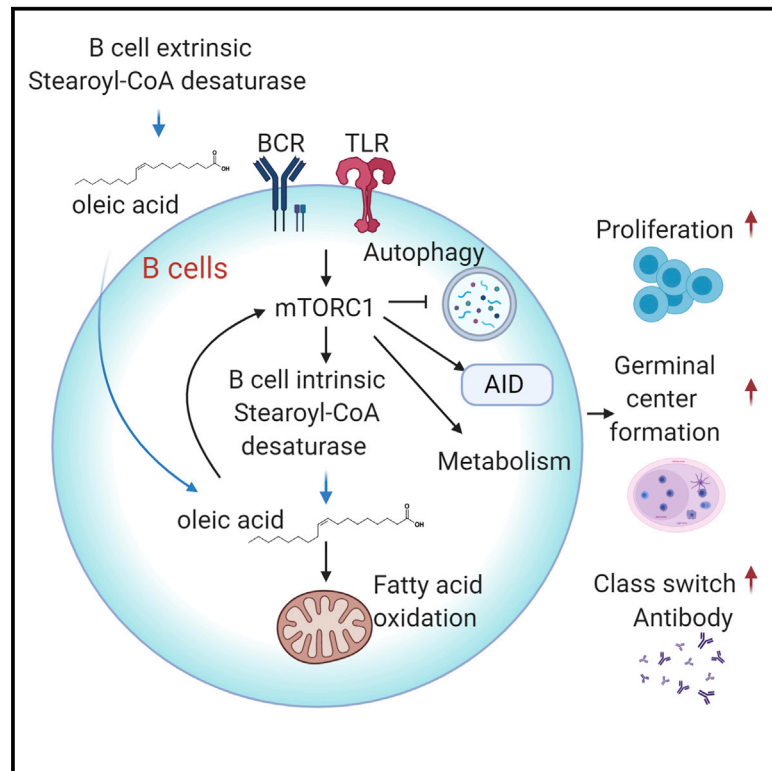

## Authors

Xian Zhou, Xingxing Zhu, Chaofan Li, ..., David A. Bernlohr, Jie Sun, Hu Zeng

## Correspondence

zeng.hu1@mayo.edu

## In Brief

Zhou et al. show that monounsaturated fatty acids (MUFAs), generated by stearoyl-CoA desaturase (SCD), support B cell mitochondrial metabolism and mTOR activity and promote B cell development and humoral immune responses. These data establish MUFA availability as a key regulator for humoral immunity and a potential therapeutic target.

## Highlights

- B cell activation increases SCD activity and MUFA content
- MUFA maintains B cell metabolic fitness and promotes proliferation and class switch
- SCD activity is required for anti-viral humoral immunity *in vivo*
- B cell-extrinsic SCD activity can compensate intrinsic B cell SCD loss

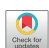

## Article

# Stearoyl-CoA Desaturase-Mediated Monounsaturated Fatty Acid Availability Supports Humoral Immunity

Xian Zhou,<sup>1</sup> Xingxing Zhu,<sup>1</sup> Chaofan Li,<sup>2</sup> Yanfeng Li,<sup>1</sup> Zhenqing Ye,<sup>3</sup> Virginia Smith Shapiro,<sup>4</sup> John A. Copland III,<sup>5</sup> Taro Hitosugi,<sup>6</sup> David A. Bernlohr,<sup>7</sup> Jie Sun,<sup>2,4</sup> and Hu Zeng<sup>1,4,8,\*</sup>

<sup>1</sup>Division of Rheumatology, Department of Medicine, Mayo Clinic, Rochester, MN 55905, USA

<sup>2</sup>Division of Pulmonary and Critical Care Medicine, Department of Medicine, Mayo Clinic, Rochester, MN 55905, USA

<sup>3</sup>Department of Biostatistics and Informatics, Mayo Clinic, Rochester, MN 55905, USA

<sup>4</sup>Department of Immunology, Mayo Clinic, Rochester, MN 55905, USA

<sup>5</sup>Department of Cancer Biology, Mayo Clinic, Jacksonville, FL 32224, USA

<sup>6</sup>Department of Oncology, Mayo Clinic, Rochester, MN 55905, USA

<sup>7</sup>Department of Biochemistry, Molecular Biology and Biophysics, University of Minnesota, Minneapolis, MN 55455, USA

<sup>8</sup>Lead Contact

\*Correspondence: [zeng.hu1@mayo.edu](mailto:zeng.hu1@mayo.edu)

<https://doi.org/10.1016/j.celrep.2020.108601>

## SUMMARY

Immune cells can metabolize glucose, amino acids, and fatty acids (FAs) to generate energy. The roles of different FA species and their impacts on humoral immunity remain poorly understood. Here, we report that proliferating B cells require monounsaturated FAs (MUFAs) to maintain mitochondrial metabolism and mTOR activity and to prevent excessive autophagy and endoplasmic reticulum (ER) stress. Furthermore, B cell-extrinsic stearoyl-CoA desaturase (SCD) activity generates MUFA to support early B cell development and germinal center (GC) formation *in vivo* during immunization and influenza infection. Thus, SCD-mediated MUFA production is critical for humoral immunity.

## INTRODUCTION

There is growing evidence that B cell development and activation are regulated by metabolic processes (Boothby and Rickert, 2017). In particular, glucose metabolism was shown to be activated by B cell receptor (BCR) or Toll-like receptor (TLR) ligand stimulation and support B cell function (Caro-Maldonado et al., 2014; Cho et al., 2011; Dufort et al., 2007). Activation of mitochondrial oxidative phosphorylation (OXPHOS) by TLR ligand or CD40L, and supported by glutamine, is required for B cell survival (Akkaya et al., 2018; Le et al., 2012; Waters et al., 2018). The central metabolic regulator, mammalian target of rapamycin (mTOR), is key to support B cell development and humoral response by mediating organelle biogenesis and various anabolic processes (Iwata et al., 2016; Jones et al., 2016; Raybuck et al., 2018; Zeng et al., 2018). However, a recent study suggested that activated B cells use glucose mainly for ribonucleotide and fatty acid (FA) biosynthesis but not for lactate production or feeding into TCA cycle (Waters et al., 2018). Thus, biomass accumulation appears to be the main feature of early B cell activation (Dufort et al., 2014). Glucose, glutamine, and FAs are the three major carbon sources. It has been recognized that nutrient availability is a key regulatory mechanism controlling immune responses (Kedia-Mehta and Finlay, 2019). Although the importance of glucose and glutamine has been evaluated, as described above, the functions of different FAs in B cells are not fully understood, partly because of the sheer diversity of FA species. Thus, it is critical to investigate how individual FA species contribute to B cell functions.

Both malnutrition and obesity impair humoral immunity (Alwarrah et al., 2018; Rytter et al., 2014). Because a plethora of metabolites are altered in general malnutrition or obesity, it is challenging to parse how each metabolite affects humoral immunity, and thus exact mechanisms linking immunity to systemic metabolism remain obscure. This is reflected in many studies that focused on the relationship between diets with varying FA contents and systemic inflammation (Fritsche, 2015). A recent study showed that germinal center (GC) B cells mainly use FA  $\beta$ -oxidation (FAO), rather than glycolysis, to meet their energetic needs, highlighting the importance of FA availability for humoral immunity (Weisel et al., 2020). However, most immunometabolism studies do not distinguish different FAs. Several earlier studies have probed the contribution of polyunsaturated FAs (PUFAs), and their derivatives, to B cell functions (Gurzell et al., 2013; Kosaraju et al., 2017; Ramon et al., 2012, 2014; Roper et al., 1995), yet little is known about the contribution of endogenously derived MUFAs to humoral immunity.

Stearoyl-CoA desaturase (SCD) is a rate-limiting enzyme in *de novo* FA biosynthesis. It converts saturated FAs (SFAs) into monounsaturated FAs (MUFAs), including oleic acid (OA) and palmitoleic acid (PO). SCD plays a central role in fuel metabolism and constitutes a potential therapeutic target for treatment of obesity and cancer (ALJohani et al., 2017). SCD1-deficient mice are protected from diet-induced obesity and hepatic steatosis (Miyazaki et al., 2007; Ntambi et al., 2002). Interestingly, some of the metabolic defects in SCD1-deficient mice persisted even when they were fed a diet containing a high level of OA

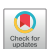

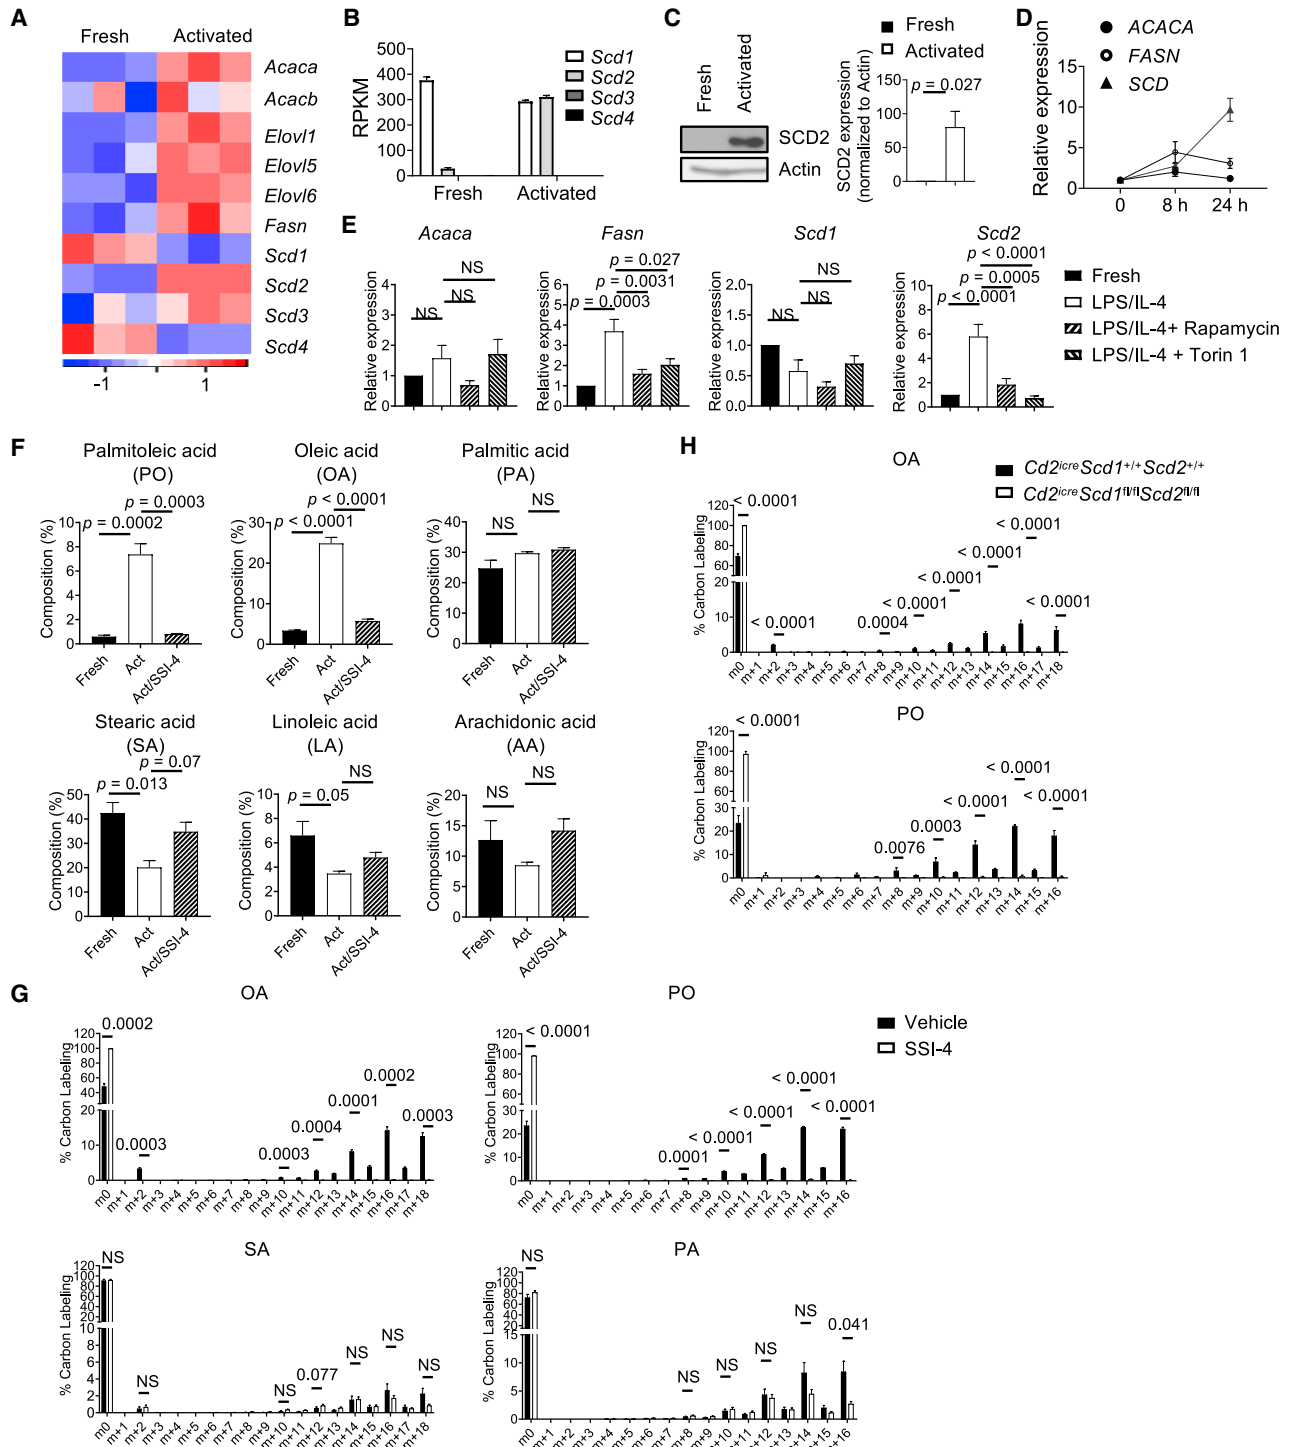

**Figure 1. SCD-Mediated MUFA Biosynthesis during B Cell Activation *In Vitro***

(A) Heatmap of fatty acid (FA) synthesis gene expression in fresh and LPS/IL-4-activated murine B cells.  
 (B) mRNA expression of four *Scd* isoforms in freshly and activated B cells, extracted from RNA-seq data. ND, not detected.  
 (C) Immunoblot analysis of SCD2 in fresh and activated murine B cells. Right: summary of SCD2 expression.  
 (D) Reverse transcription polymerase chain reaction (RT-PCR) analysis of *ACACA*, *FASN*, and *SCD* expression in human B cells at 0, 8, and 24 h after CpG/anti-CD40/IL-15/IL-10/IL-2 activation.  
 (E) RT-PCR analysis of *Acaca*, *Fasn*, *Scd1*, and *Scd2* expression in fresh and activated murine B cells treated with rapamycin (10 nM) or Torin 1 (100 nM).

(legend continued on next page)

(Miyazaki et al., 2001a, 2001b; Ntambi et al., 2002), highlighting the importance of endogenously synthesized MUFAs for proper cellular function.

Here, we use a reductionist approach to investigate the impacts of SFA and MUFA on B cells. We present mechanistic evidence that B cell development and activation require SCD-generated MUFAs, particularly OA, which maintains B cell metabolic fitness partly by supporting OXPHOS and mTORC1 activity and preventing excessive autophagy and ER stress. *In vivo*, B cells can rely on B cell-extrinsic SCD activity to provide MUFAs. In response to immune challenges, the host enhances MUFA availability, partly through SCD activity, which is required to sustain antibody production. Suppression of SCD reduces humoral immune response to immunization and weakens immune defense against respiratory influenza infection. Thus, our results provide a novel link between endogenous biosynthesis of MUFAs and humoral immunity.

## RESULTS

### SCD-Mediated MUFA Biosynthesis Is Induced during B Cell Activation

We first sought to determine the FA biosynthesis gene expression program during B cell activation. RNA sequencing (RNA-seq) was performed using fresh murine B cells and lipopolysaccharide (LPS)/IL-4-activated B cells. Expression of major FA biosynthesis genes, including *Acaca*, *Elov1*, *Elov5*, *Elov16*, *Fasn*, and *Scd2*, increased upon B cell activation (Figure 1A). Among the four murine *Scd* genes, *Scd3* and *Scd4* were below the detection limit. *Scd1* expression was slightly reduced, while *Scd2* expression, both mRNA and protein, was substantially increased (Figures 1B and 1C). Real-time PCR analysis confirmed the gene expression kinetics, in which *Scd2* expression increased the most after 24 h stimulation (Figure S1A). Multiple stimuli promoted SCD2 expression, including LPS/IL-4, anti-IgM, anti-CD40, and CpG, but not IL-4 alone (Figure S1B). Furthermore, human B cell activation also induced robust SCD expression (Figure 1D). Finally, the upregulation of *Fasn* and *Scd2* genes was dependent on mTORC1 signaling, as rapamycin and Torin 1 treatment blocked their induction (Figure 1E). Thus, antigenic stimulation of B cells activates FA biosynthetic pathway in an mTORC1 dependent manner.

To examine the functional outcome of increased FA biosynthesis gene expression, we used triple-quadrupole liquid chromatography-tandem mass spectrometry (LC-MS/MS). Our data showed that PO and OA, the main MUFAs produced by SCD, exhibited the highest increases of their relative contents in activated B cells compared with unstimulated B cells. The composition (among all cellular FAs) of palmitic acid (PA), the precursor of PO, did not change significantly, while the composition of stearic acid (SA), the precursor of OA, and the PUFAs,

including linoleic acid (LA) and arachidonic acid (AA), modestly reduced after activation (Figure 1F). This dramatic accumulation of MUFAs was dependent on SCD activity, because treatment with an SCD-specific inhibitor, SSI-4 (von Roemeling et al., 2017), largely reversed it (Figure 1F). Furthermore, the *de novo* biosynthesis of FAs from glucose was confirmed in a U-<sup>13</sup>C-6-glucose tracing experiment. When B cells were activated in medium containing <sup>13</sup>C-labeled glucose, LC-MS/MS assay detected substantial <sup>13</sup>C incorporation in OA and PO, which were abolished upon SSI-4 treatment. However, the incorporation of <sup>13</sup>C into SA and PA was largely unaffected, or only modestly affected, by SSI-4 treatment (Figure 1G). Finally, we confirmed these observations using a genetic model in which *Scd1* and *Scd2* were efficiently deleted in B cells through *Cd2iCre* (Figure S1C), an optimized variant of Cre recombinase under human *CD2* promoter, which mediates efficient recombination in lymphocytes (de Boer et al., 2003; Siegemund et al., 2015). SCD1/SCD2 deficiency completely eliminated <sup>13</sup>C-glucose incorporation into OA and PO, but not PA or SA (Figure 1H; Figure S1D). Incorporation of <sup>13</sup>C into AA, LA, and  $\alpha$ -linolenic acid was not detected in our assays (data not shown), suggesting that B cells are unable to generate these PUFAs from glucose *de novo*. Therefore, these results showed that B cell activation is associated with activation of SCD activity and increased SCD-generated MUFA content.

### SCD-Generated MUFA Supports B Cell Proliferation and Class Switch *In Vitro*

To investigate the impact of SCD-generated MUFA on B cell functions, we measured the proliferation of mouse B cells treated with different SCD inhibitors, including SSI-4, MF438, and A939572. All were capable of inhibiting B cell proliferation (Figure 2A). The inhibitory effect of SSI-4 on cell proliferation was dose dependent (Figure S2A). SSI-4 did not significantly affect B cell survival at 48 h (Figure S2B), but it reduced cell viability at 72 h (Figure S2C). Importantly, exogenous OA could rescue the proliferation and viability defects caused by SCD inhibition, demonstrating that SCD-derived MUFA is required for B cell proliferation and survival (Figures 2B, 2C, and S2A–S2C). Similar phenotypes were observed when we stimulated B cells with anti-IgM/anti-CD40 or TLR9 ligand, CpG (Figure 2B). LPS/IL-4 also stimulates class switch to IgG1. SCD inhibition strongly suppressed IgG1 class switch (Figure 2D). OA alone further enhanced B cell proliferation and IgG1 expression, and it could restore both parameters upon SSI-4 treatment (Figures 2C and 2D). In contrast, PO alone did not improve class switch and had substantial, but incomplete, rescue effects on proliferation and IgG1 expression upon SSI-4 treatment. PA and SA showed no rescue effects (Figure 2D). Moreover, PA or SA alone was unable to promote B cell proliferation and class switch (Figure S2D). Of note, the concentration of exogenous FAs used in these

(F) Composition (among all cellular FAs) of palmitoleic acid (PO), oleic acid (OA), palmitic acid (PA), stearic acid (SA), linoleic acid (LA), and arachidonic acid (AA) in fresh and activated murine B cells treated with vehicle or the SCD inhibitor SSI-4 for 48 h (n = 3).

(G) Isotopomer distribution of U-<sup>13</sup>C-glucose incorporation in OA, SA, PO, and PA in activated B cell treated with vehicle or SSI-4 at 48 h (n = 3).

(H) Isotopomer distribution of U-<sup>13</sup>C-glucose incorporation in OA and PO in activated B cells from WT or *Cd2<sup>iCre</sup>Scd1<sup>fl/fl</sup>Scd2<sup>fl/fl</sup>* mice (n = 3).

p values were calculated using Student's t test (C, G, and H) and one-way ANOVA (E and F). Data are representative of at least three (C–E) or two (F–H) independent experiments. Error bars represent SEM. See also Figure S1.

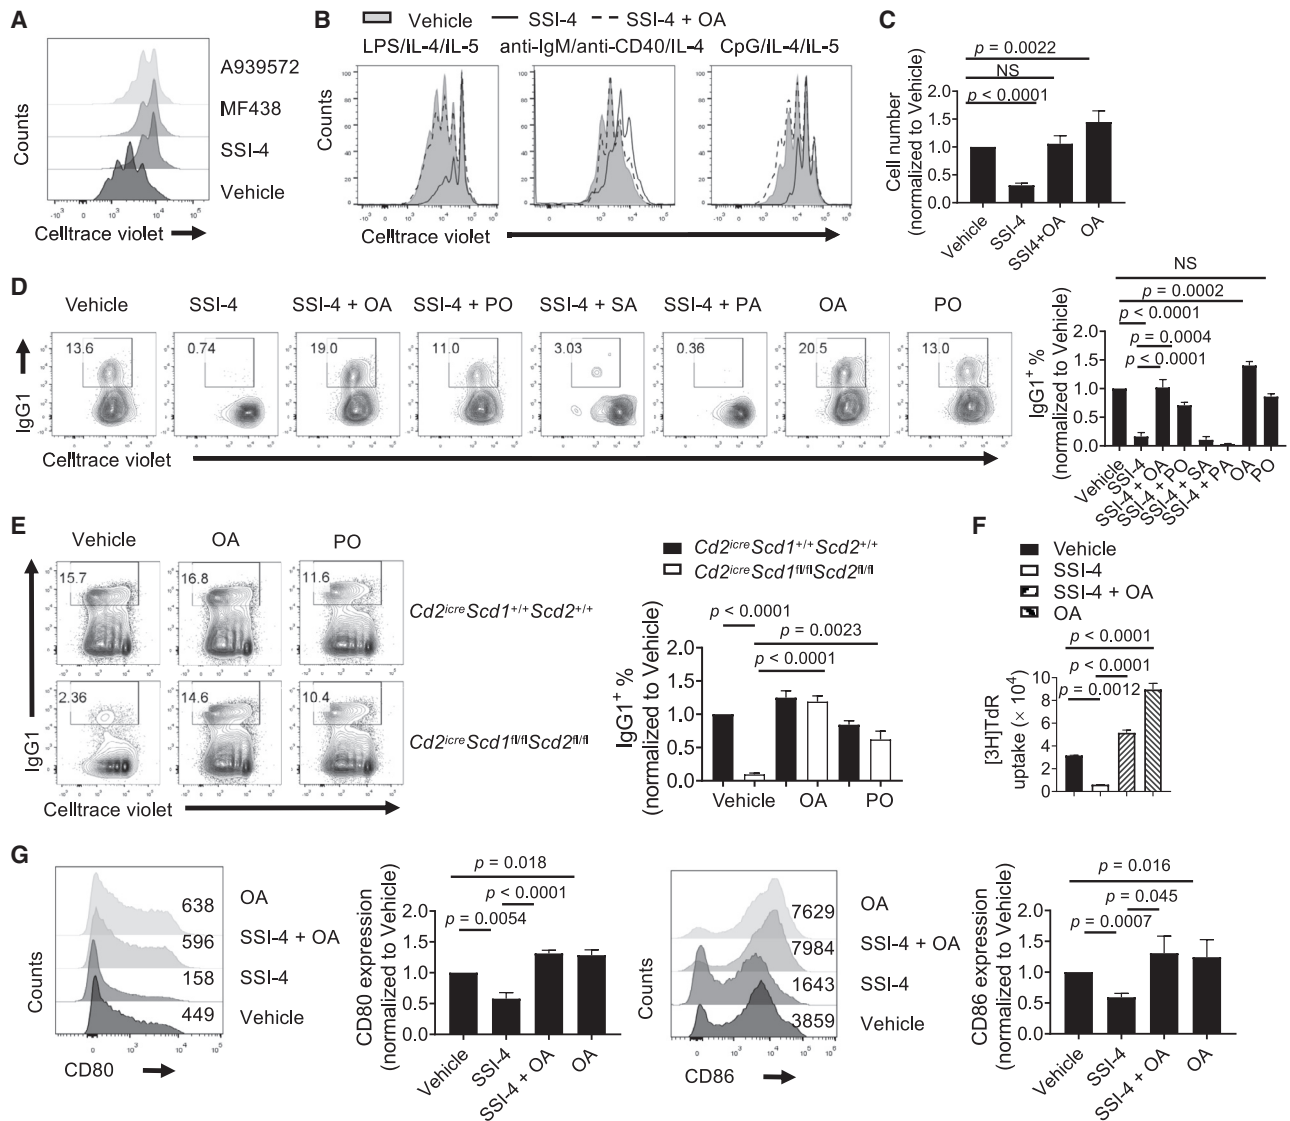

**Figure 2. SCD-Generated MUFA Is Required for B Cell Proliferation and Class Switch *In Vitro***

(A) Cell proliferation measured by dilution of CellTrace Violet (CTV) dye in LPS/IL-4-activated murine B cells treated with the SCD inhibitors A939572 (1  $\mu$ M), MF438 (1  $\mu$ M), and SSI-4 (1  $\mu$ M).

(B) Cell proliferation of murine B cells stimulated with indicated stimuli in presence of vehicle, SSI-4, or SSI-4 plus OA for 3 days.

(C) Murine B cells were stimulated with LPS/IL-4/IL-5 for 3 days in the presence of indicated inhibitor and/or fatty acids. Numbers of live B cells were summarized and normalized to vehicle group.

(D) Murine B cell proliferation and IgG1 expression upon LPS/IL-4 stimulation in the presence of vehicle, SSI-4, SSI-4 with OA (100  $\mu$ M), or PO (25  $\mu$ M), or SA (25  $\mu$ M), or PA (100  $\mu$ M), OA alone, and PO alone. Right: summary of IgG1+ percentages normalized against vehicle group.

(E) Cell proliferation and IgG1 expression in activated B cells from WT or  $Cd2^{Cre}Scd1^{fl/fl}Scd2^{fl/fl}$  mice. Right: summary of IgG1+ percentage normalized to vehicle-treated WT cells.

(F) Human B cell proliferation was measured by thymidine incorporation after activation in the presence of vehicle, SSI-4, SSI-4 plus OA, and OA alone.

(G) Expression of CD80 and CD86 on activated human B cells in the presence of vehicle, SSI-4, SSI-4 plus OA, or OA alone. Numbers indicate the mean fluorescence intensity (MFI). Right: the summary of CD80 and CD86 expression.

p values were calculated using one-way ANOVA (C–G). NS, not significant. Data are representative of three (A and F) or pooled from four (C–E and G) independent experiments. Error bars represent SEM. See also Figure S2.

*in vitro* assays was physiological on the basis of the levels of serum non-esterified FAs (NEFAs) in wild-type (WT) mice (Table S1). Moreover, SCD1/2-deficient B cells proliferated poorly and had highly reduced IgG1 expression (Figure 2E), which were fully

and partially restored by OA and PO, respectively (Figure 2E). Last, we made similar observations using human B cells. Exogenous OA promoted human B cell proliferation (Figure 2F) and activation, measured by expression of costimulatory ligands

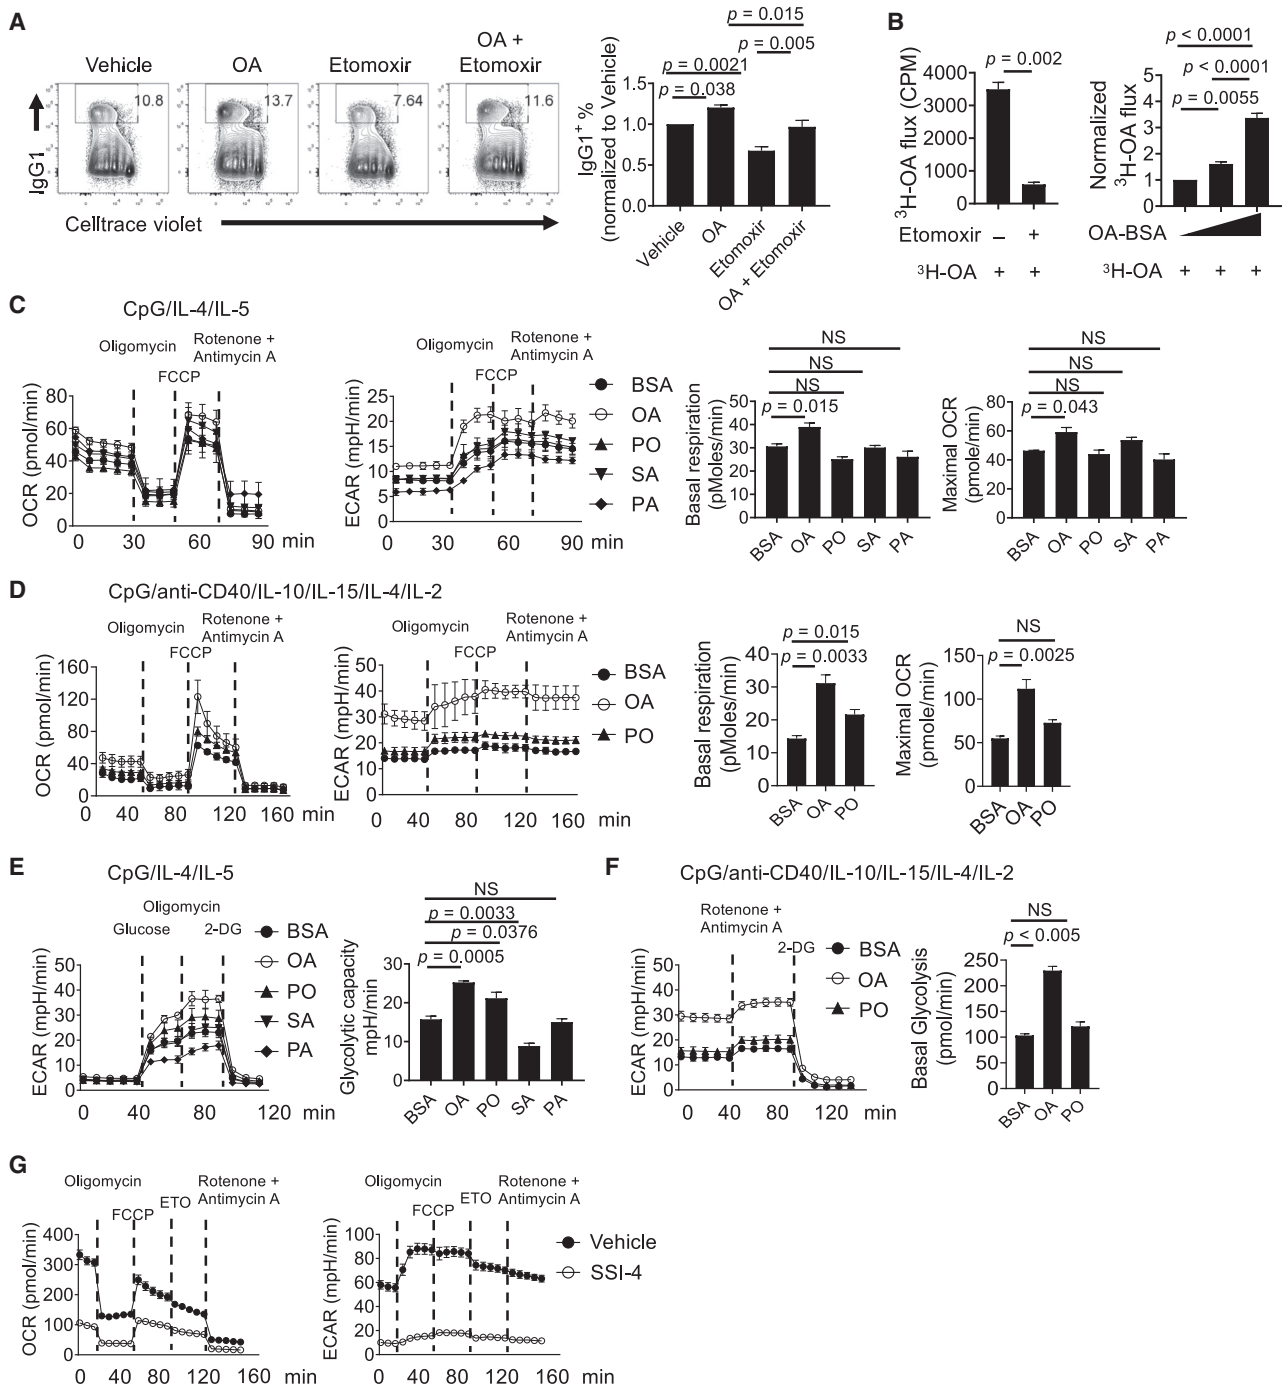

**Figure 3. MUFA Supports B Cell Metabolic Fitness**

(A) Flow cytometry analysis of murine B cell proliferation and IgG1 expression. B cells were activated in the presence of vehicle (BSA), OA alone, etomoxir, and OA plus etomoxir at 72 h. Right: summary of IgG1<sup>+</sup> B cell percentage normalized to vehicle treatment.

(B) The OA oxidation measurement by [9,10-<sup>3</sup>H]-OA flux assay. Left: activated B cells were treated with vehicle or etomoxir for 1 h before being incubated with 3 μCi [9,10-<sup>3</sup>H]-OA for another 4 h. Right: B cells were activated in the presence of increasing dose of OA, from 0 μM (BSA control) to 20 and 50 μM for 48 h, followed by incubation with 3 μCi [9,10-<sup>3</sup>H]-OA for another 4 h. OA oxidation was determined by measuring the detritiation of [9,10-<sup>3</sup>H]-OA.

(C) Oxygen consumption rate (OCR) and extracellular acidification rate (ECAR) were measured using a Seahorse XFe96 analyzer using murine B cells activated in the presence of BSA, OA, PO, SA, and PA for 48 h with MitoStress Test. Right: summary of basal respiration and maximal OCR.

(D) Measurement of OCR and ECAR in human B cells activated in the presence of BSA, OA, and PO for 72 h. Right: summary of basal respiration and maximal OCR.

(legend continued on next page)

CD80 and CD86 (Figure 2G). It also restored all these parameters upon SSI-4 treatment (Figures 2F and 2G). Thus, proliferating B cells preferentially use MUFA, especially OA, rather than SFAs, to promote their proliferation and class switch *in vitro*. The fact that exogenous OA can promote B cell activation and rescue SCD inhibition indicates that B cells can rely on either intrinsically synthesized MUFA or extrinsically provisioned MUFA.

### MUFA Maintains B Cell Metabolic Fitness

B cell activation is accompanied by increased OXPHOS, which is important to support humoral immunity (Akkaya et al., 2018; Caro-Maldonado et al., 2014; Waters et al., 2018). FAs can be used to fuel OXPHOS, but it is unclear how different FAs contribute to B cell metabolism. The inhibitor etomoxir, which blocks carnitine palmitoyltransferase I (CPT1)-mediated FA import to mitochondria, reduced B cell class switch and negated the effects of OA treatment at 40  $\mu$ M, a dose selective to CPT1 inhibition (Weisel et al., 2020) (significantly lower than OA treatment alone, but not to the level of etomoxir treatment alone) (Figure 3A), suggesting that B cells oxidize OA to promote cell activation. FAO leads to the incorporation of FA-derived hydrogen and carbon into H<sub>2</sub>O and citrate (Koutsari et al., 2013). Indeed, we verified that OA was oxidized in mitochondrial by measuring <sup>3</sup>H<sub>2</sub>O generation from [9,10-<sup>3</sup>H]-OA, which was greatly suppressed by etomoxir (Figure 3B). Furthermore, when B cells were cultured with increasing doses of exogenous OA, they exhibited an increasing FAO rate (Figure 3B). Similarly, stable isotope tracing using U-<sup>13</sup>C-OA showed that <sup>13</sup>C incorporation into citrate was significantly blocked by etomoxir (Figures S3A and S3B). Increased FAO should result in an elevated cell oxygen consumption rate (OCR). To analyze the metabolic impact of SFAs and MUFAs, we measured OCR of CpG/IL-4/IL-5-stimulated B cells with different exogenous FA treatment. Addition of OA, but not SFA, enhanced B cell OCR (Figure 3C). Similar findings were observed using LPS/IL-4 and anti-IgM/IL-4 stimulation (Figures S3C and S3D). Importantly, the OA-augmented respiration was also observed in human B cells (Figure 3D). The effects of PO on B cell metabolism appeared to be variable. Although it did not promote mouse B cell OCR upon CpG and anti-IgM/anti-CD40 stimulation (Figures 3C and S3D), it enhanced basal OCR in LPS/IL-4-stimulated mouse B cells (Figure S3C) and in CpG/anti-CD40/IL-10/IL-15/IL-4/IL-2-stimulated human B cells (Figure 3D), suggesting a context-dependent metabolic impact of PO. Moreover, OA and, to a lesser degree, PO increased the glycolytic capacity of activated murine and human B cells, while SFA had either a negative or no effect on glycolysis (Figures 3E and 3F). Conversely, inhibition of SCD activity strongly suppressed B cell respiration and glycolysis (Figure 3G). Overall, these data suggest that provision of OA through SCD activity is critical for B cell metabolic fitness.

### SCD-Mediated MUFA Supports mTORC1 Activity and Prevents Excessive Autophagy

SCD-mediated FA metabolism has been linked to autophagy induction in non-immune cells, but there are contradictory findings (Huang et al., 2015; Ogasawara et al., 2014; Tan et al., 2014). It is unclear how FA metabolism may link to autophagy in lymphocytes. To examine how SCD inhibition affects subcellular organelles, we performed transmission electron microscopy on SSI-4-treated B cells and SCD-deficient B cells. We observed increased structures with double-layer membrane encompassing various organelles or multi-lamellar membrane structures, which are signatures of autophagosomes (Mizushima et al., 2011) (Figures 4A and S4A). The conversion of the soluble form of LC3 (LC3-I) to the autophagic vesicle-associated form (LC3-II) is a hallmark of autophagy. Immunoblot analysis showed that SSI-4-treated B cells (Figure 4B) and SCD-deficient B cells (Figure 4C) had significant increase of LC3-II/LC3-I ratio, which was completely rescued by exogenous OA. Consistent with these data, B cells isolated from GFP-LC3 reporter mouse had higher LC3 expression upon SCD inhibition (Figure S4B). mTORC1 is known to control autophagy (Kim and Guan, 2015). We observed reduced mTORC1 activation, measured by phosphorylation of its downstream targets S6K and S6, in SSI-4-treated B cells or SCD1/2-deficient B cells, which were restored by exogenous OA (Figures 4B and 4C). Reduced expression of activation-induced cytidine deaminase (AID) was observed upon SSI-4 treatment or in the absence of SCD1/2, consistent with the positive effect of mTORC1 on AID induction (Raybuck et al., 2018) (Figures 4B and 4C). Furthermore, OA treatment alone enhanced mTORC1 activity (Figure 4C). SCD inhibition also suppressed B cell mTORC1 activity *in vivo*, when mice were fed with SSI-4 chow or control chow followed by immunization with hapten 4-hydroxy-3-nitrophenylacetyl conjugated with ovalbumin (NP-OVA) (Figure 4D). Finally, the classic autophagy inhibitors 3-methyladenine (3-MA) and wortmannin successfully rescued B cell proliferation and IgG1 expression in the presence of SSI-4 (Figure 4E). Increased SFA content is associated with enhanced ER stress (Wei et al., 2006). Because SCD inhibition increases the SFA/MUFA ratio (Figure 1F), it could also induce ER stress. We found that expression of ER stress-related genes, including *Chop*, *Atf4*, and *Sqstm1*, increased after SSI-4 treatment, whereas exogenous OA reversed them (Figure S4C). Taken together, these data showed that SCD-mediated MUFA availability suppresses ER stress and maintains mTORC1 activity, which prevents overactivation of autophagy.

### Systemic SCD Activity Supports Early B Cell Development and Humoral Immunity *In Vivo*

Next, we investigated how SCD activity contributes to B cell development and function *in vivo*. Feeding mice with SSI-4 chow for 1 week reduced the frequencies of immature B cells

(E) Glycolytic capacity of murine B cells activated in presence of BSA, OA, PO, SA, and PA at 48 h was measured using a glycolysis stress test. Right: summary of glycolytic capacity.

(F) ECAR was measured in activated human B cells in the presence of BSA, OA, and PO for 72 h. Right: summary of basal glycolysis rate.

(G) Measurement of OCR and ECAR in the activated murine B cells treated with vehicle or SSI-4 for 48 h.

p values were calculated using Student's t test (B) and one-way ANOVA (A–F). NS, not significant. Data are representative of at least three (B–G) independent experiments or pooled from four (A) independent experiments. Error bars represent SEM. See also Figure S3.

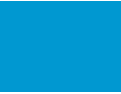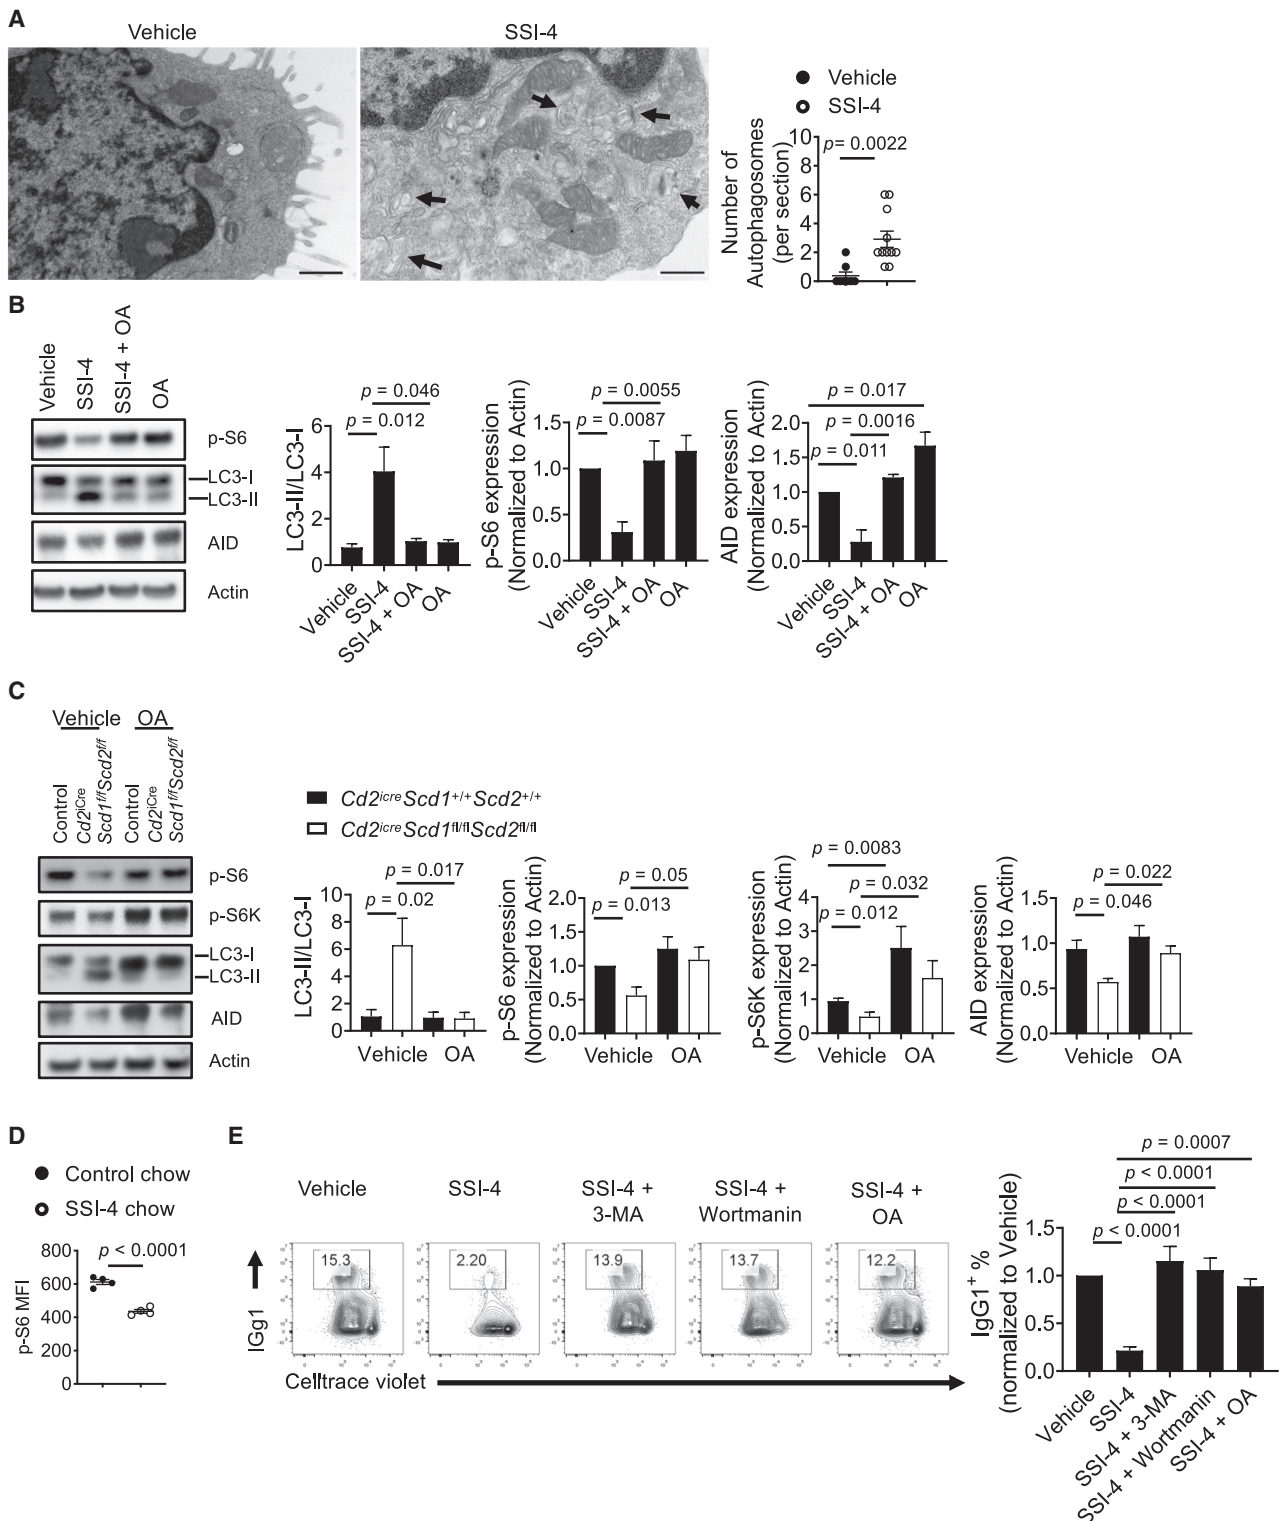

**Figure 4. Inhibition of SCD Activity Induces the Formation of Autophagosomes and Suppresses mTORC1 Activity**

(A) Transmission electron microscopic image of activated mouse B cell treated with vehicle or SSI-4. Arrows indicate autophagosome structures. Right: numbers of autophagosomes (per section) found in vehicle (n = 8) or SSI-4 (n = 11) treated cells. Scale bars: 0.5  $\mu$ m.

(B) Immunoblot analysis of LC3-I/LC3-II, p-S6, and AID in activated murine B cells in presence of vehicle, SSI-4, SSI-4 plus OA, and OA alone. Right: summary of the LC-II/LC3-I ratio and the relative expression of p-S6 and AID (normalized to that in vehicle-treated samples).

(legend continued on next page)



and B cell precursors (CD19<sup>+</sup>B220<sup>int</sup>) (Figure S5A) and CD25<sup>+</sup> pre-B cells (Figure S5B) in bone marrow (BM) but did not affect the composition of thymocytes (Figure S5C), and peripheral B cells and CD4<sup>+</sup> T cells (Figures S5D–S5F), with a slight increase of mature B cell frequency (Figure S5G). Thus, short-term suppression of SCD activity reduces early B cell development but does not affect peripheral mature B and T cells. However, there was a modest reduction of GC percentage and IgA expression in Peyer's patches, where gut microbiota drives constitutive GC generation and IgA class switch (Fagarasan et al., 2010) (Figures S5H and S5I), suggesting that SCD activity may be required for these processes. We next evaluated the impact of SCD inhibition on foreign antigen-induced humoral immunity. Notably, NP-OVA immunization significantly increased serum OA, but not PO content (Figure 5A), indicating that immune challenge is associated with increased systemic MUFA content *in vivo*. SSI-4 treatment substantially reduced both OA and PO contents in immunized mice as expected (Figure 5A). Importantly, SCD inhibition significantly suppressed GC formation (Figure 5B) and reduced NP<sup>+</sup> GC B cells (Figure 5C), but not B220<sup>int</sup>CD138<sup>+</sup> plasmablast generation (Figure 5D), suggesting that GC formation, but not plasmablast differentiation, relies more on MUFA availability. Furthermore, the percentage of follicular helper T (Tfh) cells remained normal, suggesting that B cell activation is more sensitive to SCD inhibition (Figure 5E). Consequently, the production of anti-NP-specific IgG and IgG1, but not IgM, antibodies was significantly reduced upon SCD inhibition (Figure 5F). Therefore, SCD activity supports BM B cell development and promotes GC formation and antibody production upon immunization.

### SCD Activity Is Required for Humoral Immunity against Influenza Infection

Humoral immunity plays a critical role against influenza infection (Rangel-Moreno et al., 2008). How FA metabolism regulates anti-influenza immunity remains incompletely understood. A previous study showed that deficiency of FABP5 increased anti-influenza antibody production (Gally et al., 2013). Deficiencies of FABP family molecules are associated with increased MUFA content, suggesting a link between MUFA availability and anti-influenza humoral immunity (Hertzel et al., 2006; Hotamisligil and Bernlohr, 2015). Indeed, we observed increased serum OA and PO contents after H1N1 influenza A infection, indicating that influenza infection enhances MUFA availability (Figure 6A). Feeding with SSI-4 chow led to more severe weight loss compared with control chow (Figure 6B). SCD inhibition significantly reduced the frequency of GC B cells (Figure 6C) and the expression of Bcl6, a key transcription factor for GC B cell differentiation (Figure 6D). However, it did not affect CD138<sup>+</sup> plasmablast formation (Figure 6E), nor did it affect CXCR5<sup>+</sup>Bcl6<sup>hi</sup> Tfh cell differentiation (Figure 6F). Consequently, SCD inhibition significantly damp-

ened the production of serum anti-influenza IgG, IgG1, and IgG2c, but not IgM (Figure 6G). Altogether, these data suggested that SCD activity is essential for antigen specific GC B cell formation and antibody production upon respiratory viral infection *in vivo*.

### Intrinsic SCD Activity Is Not Required for B Cell Development and B Cell Response *In Vivo*

Although our above data clearly demonstrated that SCD-generated MUFAs were critically required for B cell development and function, the sources of the SCD activity remained unknown. Because our *in vitro* experiments demonstrated that exogenous OA was able to rescue the SCD-deficient B cells, it is possible that B cell-extrinsic SCD activity could compensate the loss of SCD in B cells. To address this question, we first examined B cell development in *Cd2<sup>Cre</sup>Scd1<sup>fl/fl</sup>Scd2<sup>fl/fl</sup>* mice, in which *Scd1* and *Scd2* were deleted in all lymphocytes. We did not observe significant alteration in early B cell development, indicating that B cell-intrinsic SCD activity was dispensable for early B cell development (Figure 7A). Moreover, we examined *Cd19<sup>Cre</sup>Scd1<sup>fl/fl</sup>Scd2<sup>fl/fl</sup>* mice, in which *Scd1* and *Scd2* were deleted specifically and efficiently in B cells at a later stage (Hobeika et al., 2006) (Figure S6A). *Cd19<sup>Cre</sup>Scd1<sup>fl/fl</sup>Scd2<sup>fl/fl</sup>* mice had normal GC formation upon NP-OVA immunization (Figure 7B). To eliminate any possible secondary effects elicited by chronic SCD deficiency during B cell development, we constructed chimera mice by transferring purified SCD-deficient B cells from tamoxifen-treated *Cre<sup>ER</sup>Scd1<sup>fl/fl</sup>Scd2<sup>fl/fl</sup>* mice, together with CD4 T cells from OT-II transgenic mice and WT mice, into *Rag1<sup>-/-</sup>* mice, followed by immunization with NP-OVA (Lee et al., 2013). Again, we did not observe any differences in terms of GC formation (Figure 7C) and antibody production (Figure 7D). Altogether, these data indicate that B cell-intrinsic SCD activity is not essential for B cell development and function, or alternatively, B cell-extrinsic SCD activity can compensate for the loss of SCD activity in B cells to support humoral immunity.

## DISCUSSION

Despite the rapid progress in the immunometabolism field, our understanding of FA metabolism in adaptive immunity remains highly limited. Most previous research has focused on PUFA and its derivatives, including n-3 PUFA (Crouch et al., 2019; Gurzell et al., 2013; Kosaraju et al., 2017), prostaglandin E2 (Roper et al., 1995), and the pro-resolving mediator 17-hydroxydosa-hexaenoic acid (Ramon et al., 2012, 2014). The impact of other FA species, especially endogenously generated FAs, remains poorly defined. Our work offers a comprehensive study of the relationship between MUFA availability and humoral immunity. It reveals that murine and human B cells preferentially rely on

(C) Immunoblot analysis of LC3-I/LC3-II, p-S6, p-S6K, and AID in activated B cells from control and *Cd2<sup>Cre</sup>Scd1<sup>fl/fl</sup>Scd2<sup>fl/fl</sup>* mice with or without exogenous OA. Right: summary of the LC-II/LC-I ratio and the relative expression of p-S6, p-S6K, and AID (normalized to that in vehicle-treated WT samples).

(D) Mice were fed with control chow and SSI-4 chow, followed by NP-OVA immunization for 1 week. p-S6 in splenic B cells was measured using flow cytometry. (E) Cell proliferation and IgG1 expression in activated murine B cells treated with SSI-4 in the presence of 3-methyladenine (3-MA) (1 mM) and wortmannin (1 μM) or OA. Right: summary of the IgG1<sup>+</sup> percentages.

p values were calculated using Student's t test (A and D) and one-way ANOVA (B–C and E). Data were pooled from four (B and C) and five (E) independent experiments. Error bars represent SEM. See also Figure S4.

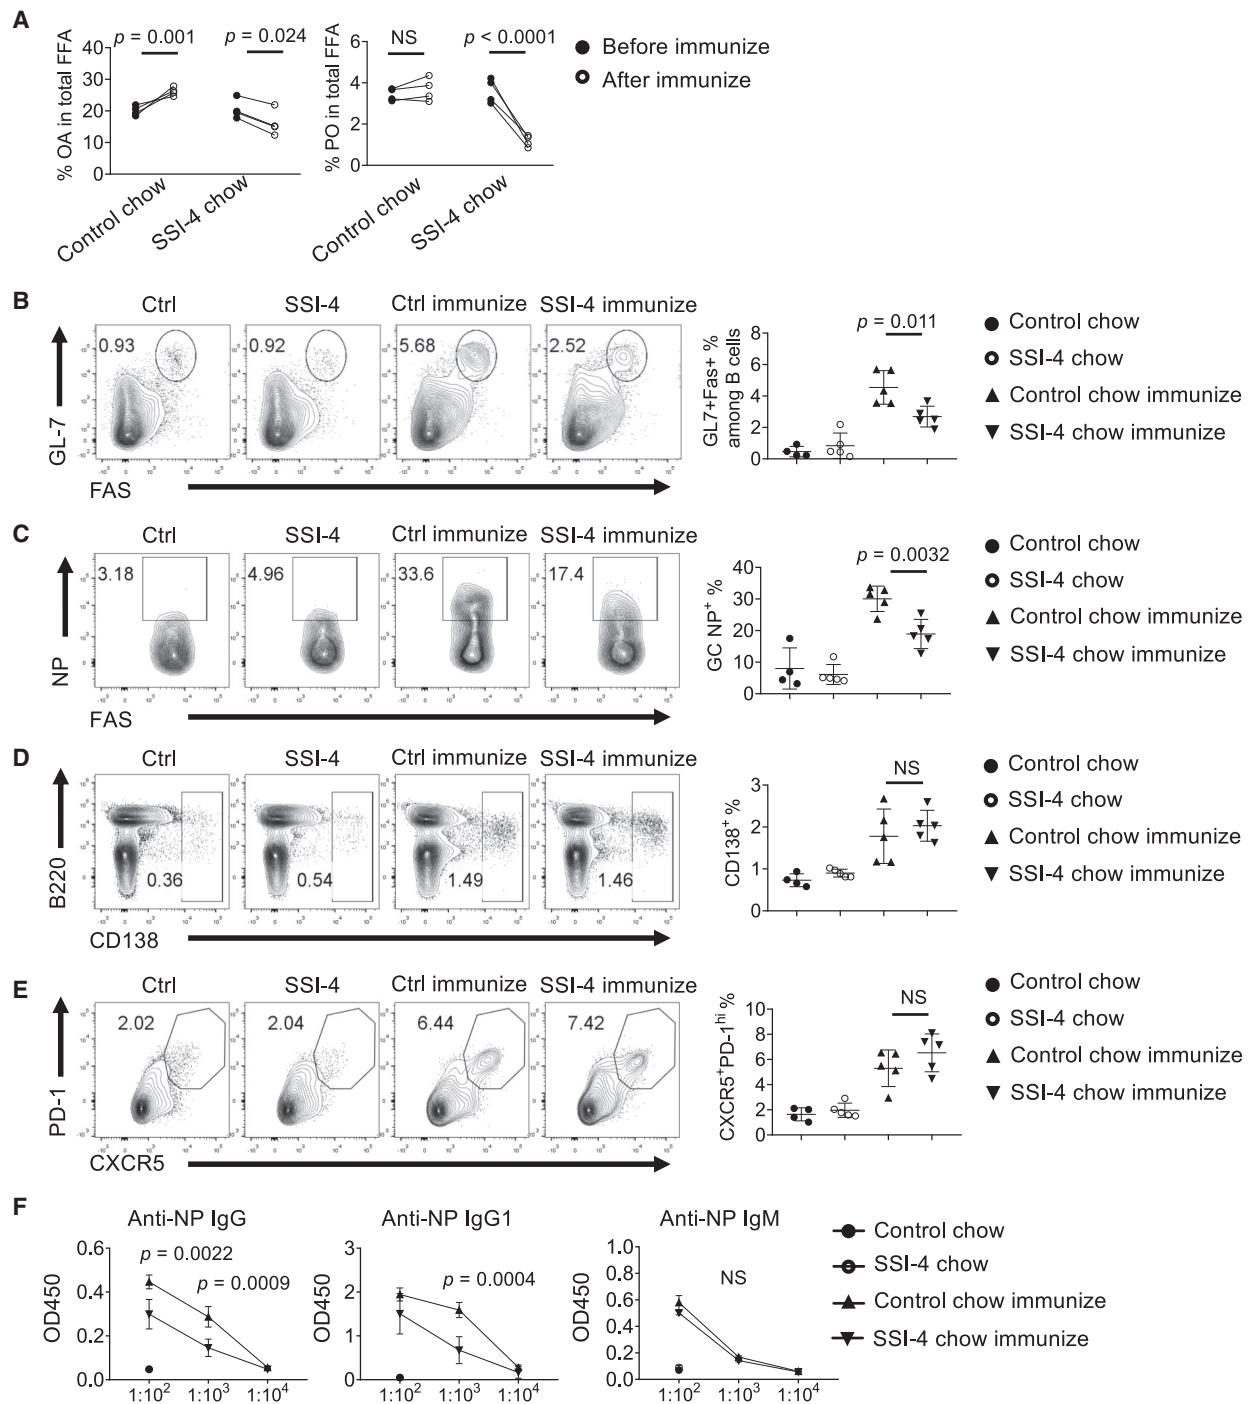

**Figure 5. Systemic SCD Activity Is Essential for Humoral Immune Response *In Vivo***

(A) Composition of OA and PO among total free FAs in sera (n = 4).

(B–E) Mice were divided into four groups. They were fed with control chow or SSI-4 chow, followed with or without NP-OVA immunization. Flow cytometry of germinal center (GC) (B), antigen-specific NP<sup>+</sup> expression among GC B cells (C), B220<sup>int</sup>CD138<sup>+</sup> expression (D), and expression of PD-1 and CXCR5 among CD4<sup>+</sup> T cell (E). Right: the frequencies of GC B cells (B), NP<sup>+</sup> GC B cells (C), B220<sup>int</sup>CD138<sup>+</sup> plasmablasts (D), and PD-1<sup>+</sup>CXCR5<sup>+</sup> Tfh cells (E).

(F) ELISA measurements of serum anti-NP immunoglobulins from unimmunized and immunized mice fed with control chow or SSI-4 chow, presented as absorbance at 450 nm (A<sub>450</sub>).

p values were calculated using Student's t test (A–F). NS, not significant. Data are representative of two (A) and three (B–F) independent experiments. Error bars represent SEM. See also Figure S5.

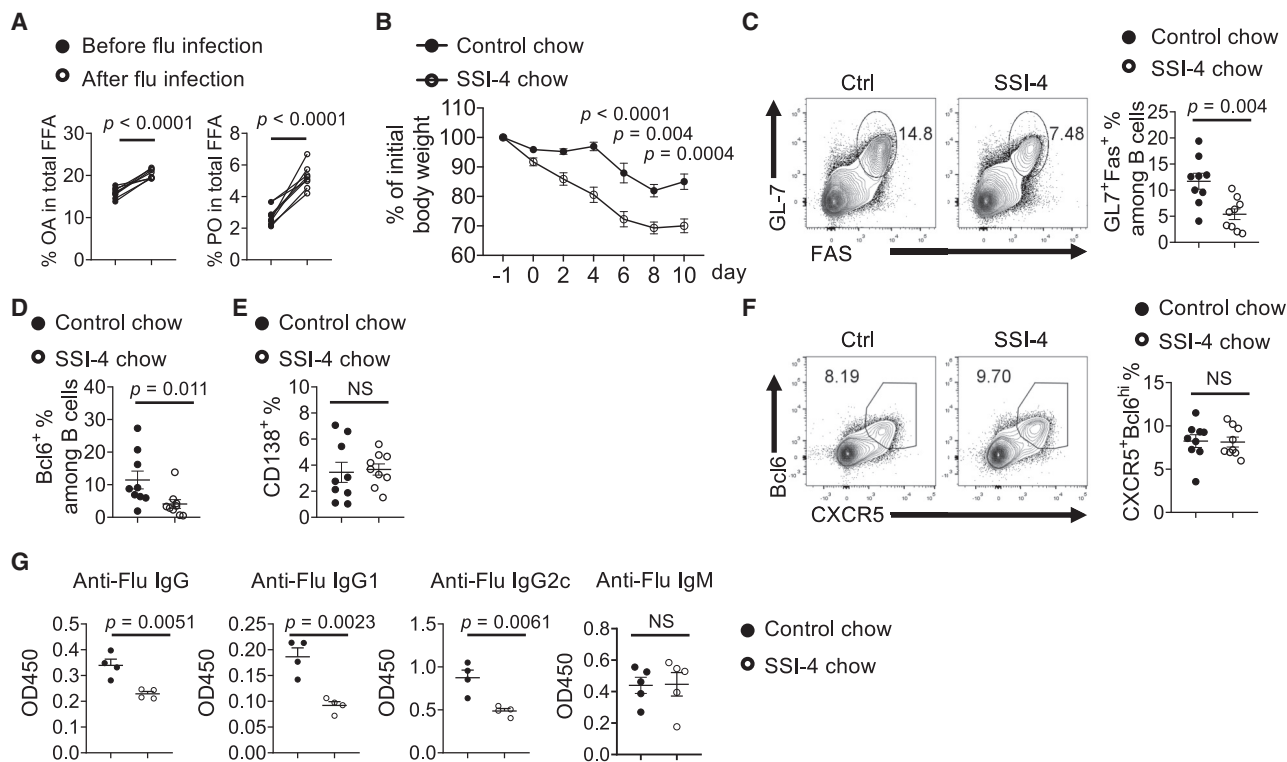

**Figure 6. SCD Activity Is Required for Humoral Immunity against Influenza Infection**

(A) Composition of OA and PO among total free FAs in sera before and after influenza virus infection ( $n = 8$ ).  
 (B) Body weight change in mice fed with control chow or SSI-4 chow for 1 week following influenza infection.  
 (C) Flow cytometry analysis of GC B cells in mediastinal lymph nodes at day 11 following infection. Right: the frequencies of GC B cells.  
 (D) The frequencies of Bcl6<sup>+</sup> expression among B cells in mediastinal lymph nodes.  
 (E) The frequencies of B220<sup>int</sup>CD138<sup>+</sup> plasmablasts.  
 (F) Flow cytometry analysis of Tfh cells in mediastinal lymph nodes. Right: the frequencies of CXCR5<sup>+</sup>Bcl6<sup>hi</sup> Tfh among CD4<sup>+</sup> T cells in mediastinal lymph nodes.  
 (G) Influenza virus-specific antibodies IgG, IgG1, IgG2c, and IgM in sera were measured using ELISA.  
 p values were calculated using Student's t test (A–G). Results are representative of three (B–G) independent experiments. Error bars represent SEM.

MUFA to maintain their metabolic fitness and promote antibody production. SCD, which catalyzes endogenous MUFA generation, critically contributes to B cell development and activation. These observations are consistent with a recent finding that GC B cells preferentially use FAO rather than glycolysis (Weisel et al., 2020). However, we show that all FAs are not created equal for B cells. The quality of FA matters, and proliferating B cells preferentially use MUFA rather than SFA. Thus, our data suggest that the SCD may constitute a potential target for B cell-mediated diseases. Modulation of MUFA availability, through either dietary intervention or pharmaceutical targeting of SCD, may benefit B cell-dependent immunological diseases, including viral infection and certain autoimmunity.

Our results demonstrated that SCD-generated OA is required to sustain mTORC1 activity and metabolic fitness of B cells. mTORC1 activity is critical for B cell isotype switch (Raybuck et al., 2018), and mitochondrial metabolism supports B cell survival (Akkaya et al., 2018). Thus, our results link MUFA availability to B cell antibody generation and metabolism for the first time. In contrast to a recent study, we found no major defects in CD4<sup>+</sup> T cell differentiation upon SCD inhibition, at least within our experimental schemes. The discrepancy could reflect the

use of different SCD inhibitors and different immune challenge models (primary intranasal infection using PR8 strain in our study versus intraperitoneal immunization using X31 strain) (Son et al., 2020). Nevertheless, our results indicate that CD4<sup>+</sup> T cells are less sensitive to SCD inhibition, and they may preferentially use different fuel sources, which warrant further investigation.

Notably, our data demonstrate that even though B cells are able to synthesize MUFA, loss of B cell-intrinsic SCDs can be compensated by extrinsic SCD activity, indicating that humoral immunity is supported by non-lymphoid cell-derived MUFAs. Although the source of the B cell-extrinsic SCD activity that sustains humoral immunity awaits future investigation, major metabolic organs expressing high levels of SCD, such as liver and adipose tissues, are potential candidates (Kaestner et al., 1989). Alternatively, stromal cells in lymphoid organs may supply MUFA to support B cells at the local microenvironment. Previous studies indicated that memory CD8<sup>+</sup> T cells rely on intrinsically produced FAs to maintain their functions (O'Sullivan et al., 2014). In contrast, we show that B cells can use extrinsic source of MUFA to support their functions. Thus, B cells are nurtured by cell-extrinsic FA and targeting non-immune cells may be

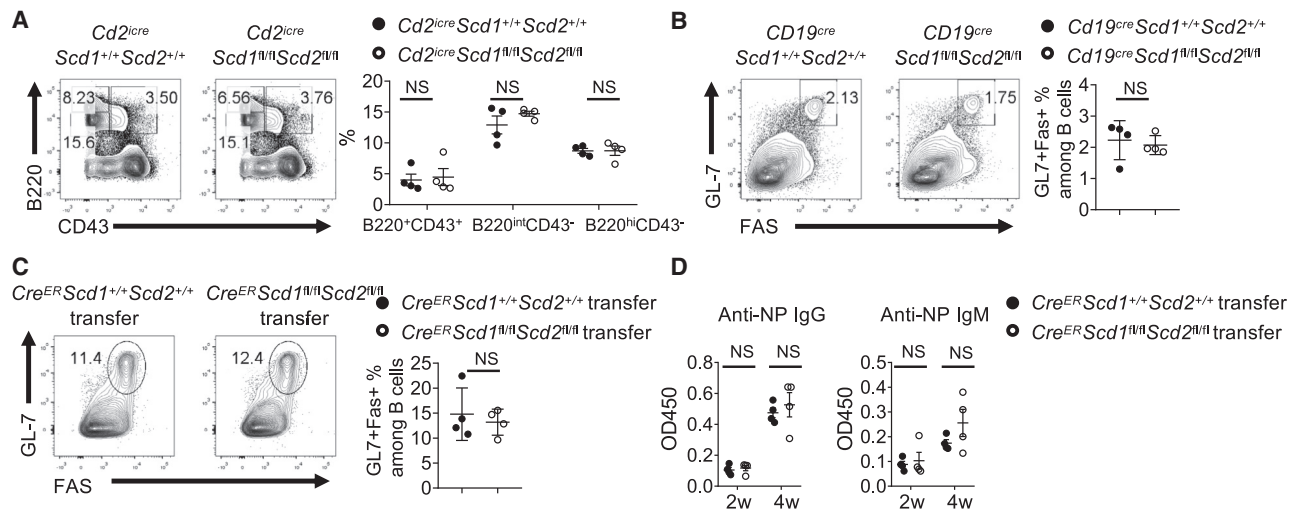

**Figure 7. B Cell-Intrinsic SCD Activity Is Not Required for B Cell Development and Humoral Response *In Vivo***

(A) Flow cytometry analysis of B cell development in bone marrow from WT and  $Cd2^{Cre} Scd1^{fl/fl} Scd2^{fl/fl}$  mice. Right: the frequencies of  $B220^{+}CD43^{+}$  pro-B cells,  $B220^{int}CD43^{-}$  pre-B/immature B cells, and  $B220^{hi}CD43^{-}$  circulating mature B cells. (B) WT and  $Cd19^{Cre} Scd1^{fl/fl} Scd2^{fl/fl}$  mice were immunized with NP-OVA. Flow cytometry analysis of GC B cells. Right: the frequencies of GC B cells. (C and D) B cells were purified from tamoxifen-treated  $Cre^{ER} Scd1^{+/+} Scd2^{+/+}$  and  $Cre^{ER} Scd1^{fl/fl} Scd2^{fl/fl}$  mice. They were mixed with  $CD4^{+}$  T cells purified from OT-II mice and WT C57BL/6 mice and transferred into  $Rag1^{-/-}$  mice. The recipient mice were immunized with NP-OVA. (C) Flow cytometry analysis of GC B cells in spleen. Right: the frequencies of GC B cells. (D) ELISA measurements of serum anti-NP immunoglobulins at 2 and 4 weeks after first immunization, presented as absorbance at 450 nm ( $A_{450}$ ). p values were calculated using Student's t test (A–D). NS, not significant. Data were pooled from four (A and B) and represent two (C and D) independent experiments. Error bars represent SEM. See also Figure S6.

required to modulating MUFA availability and thus humoral immunity.

There are some major limitations of our study. MUFA likely contributes to a multitude of cellular functions, including membrane structure, ER stress, metabolism, proliferation, and survival. How MUFA coordinates these functions requires further investigation. Another limitation is that most of our metabolic assays were performed using *in vitro* activated bulk B cells because of current technical constraint even with a state-of-the-art metabolomics platform. *In vitro* activated B cells may not necessarily recapitulate their *in vivo* metabolic features. Future studies with more sensitive metabolomics technologies are required to tease out the metabolic requirement of FAs in B cell subsets *in vivo*.

## STAR★METHODS

Detailed methods are provided in the online version of this paper and include the following:

- KEY RESOURCES TABLE
- RESOURCE AVAILABILITY
  - Lead Contact
  - Material Availability
  - Data and Code Availability
- EXPERIMENTAL MODEL AND SUBJECT DETAILS
  - Human B cell
  - Mice
- METHOD DETAILS

- RNA-seq
- Immune cell Purification and Culture
- Non-esterified free fatty acids (NEFAs) and Total Fatty Acid Composition
- Mass spectrometer measurement of serum NEFA using liquid chromatography system
- NEFA isotopomer analysis
- [9,10- $^3H$ ]-OA flux assay
- [U- $^{13}C$ ]-OA oxidation assay
- Metabolic Assays
- Electron microscopy
- Immunoblotting
- Quantitative Real-time PCR
- Flow Cytometry
- ELISA

## ● QUANTIFICATION AND STATISTICAL ANALYSIS

## SUPPLEMENTAL INFORMATION

Supplemental Information can be found online at <https://doi.org/10.1016/j.celrep.2020.108601>.

## ACKNOWLEDGMENTS

We thank Dr. Douglas Green at St. Jude Children's Research Hospital for spleen cells from GFP-LC3 mice. We thank Dr. Michael Jensen for his expert advice on FA metabolism. This work was partly supported by National Institutes of Health (NIH) grants R01 CA225680 (to T.H.), R01 AG047156, R01 AI112844, and R01 AI147394 (to J.S.) and a Discovery Science Award (93059065) from the Center for Biomedical Discovery at Mayo Clinic (to

H.Z.). The Mayo Clinic Metabolomics Core is supported by NIH grant U24DK100469.

#### AUTHOR CONTRIBUTIONS

X. Zhou designed and performed the cellular, molecular, and animal experiments and wrote the manuscript. X. Zhu and Y.L. carried out animal experiments and microscopy data analysis. C.L. performed influenza infection and heatmap graph. Z.Y. performed RNA-seq data analysis. T.H. performed OA oxidation assays. J.A.C. provided SSI-4 and SSI-4 chow. V.S.S., T.H., D.A.B., and J.S. provided research materials and assisted data interpretation. H.Z. designed experiments, wrote the manuscript, and supervised the study.

#### DECLARATION OF INTERESTS

H.Z. and J.A.C. have a pending patent application regarding use of the SCD inhibitor SSI-4.

Received: July 7, 2020

Revised: November 13, 2020

Accepted: December 14, 2020

Published: January 5, 2021

#### REFERENCES

Akkaya, M., Traba, J., Roesler, A.S., Miozzo, P., Akkaya, B., Theall, B.P., Sohn, H., Pena, M., Smelkinson, M., Kabat, J., et al. (2018). Second signals rescue B cells from activation-induced mitochondrial dysfunction and death. *Nat. Immunol.* **19**, 871–884.

AlJohani, A.M., Syed, D.N., and Ntambi, J.M. (2017). Insights into stearoyl-CoA desaturase-1 regulation of systemic metabolism. *Trends Endocrinol. Metab.* **28**, 831–842.

Alwarawah, Y., Kiernan, K., and MacIver, N.J. (2018). Changes in nutritional status impact immune cell metabolism and function. *Front. Immunol.* **9**, 1055.

Boothby, M., and Rickert, R.C. (2017). Metabolic regulation of the immune humoral response. *Immunity* **46**, 743–755.

Caro-Maldonado, A., Wang, R., Nichols, A.G., Kuraoka, M., Milasta, S., Sun, L.D., Gavin, A.L., Abel, E.D., Kelsoe, G., Green, D.R., and Rathmell, J.C. (2014). Metabolic reprogramming is required for antibody production that is suppressed in anergic but exaggerated in chronically BAFF-exposed B cells. *J. Immunol.* **192**, 3626–3636.

Cho, S.H., Ahn, A.K., Bhargava, P., Lee, C.H., Eischen, C.M., McGuinness, O., and Boothby, M. (2011). Glycolytic rate and lymphomagenesis depend on PARP14, an ADP ribosyltransferase of the B aggressive lymphoma (BAL) family. *Proc. Natl. Acad. Sci. U S A* **108**, 15972–15977.

Crouch, M.J., Kosaraju, R., Guesdon, W., Armstrong, M., Reisdorph, N., Jain, R., Fenton, J., and Shaikh, S.R. (2019). Frontline science: a reduction in DHA-derived mediators in male obesity contributes toward defects in select B cell subsets and circulating antibody. *J. Leukoc. Biol.* **106**, 241–257.

de Boer, J., Williams, A., Skavdis, G., Harker, N., Coles, M., Tolaini, M., Norton, T., Williams, K., Roderick, K., Potocnik, A.J., and Kioussis, D. (2003). Transgenic mice with hematopoietic and lymphoid specific expression of Cre. *Eur. J. Immunol.* **33**, 314–325.

Dufort, F.J., Bleiman, B.F., Gumina, M.R., Blair, D., Wagner, D.J., Roberts, M.F., Abu-Amer, Y., and Chiles, T.C. (2007). Cutting edge: IL-4-mediated protection of primary B lymphocytes from apoptosis via Stat6-dependent regulation of glycolytic metabolism. *J. Immunol.* **179**, 4953–4957.

Dufort, F.J., Gumina, M.R., Ta, N.L., Tao, Y., Heyse, S.A., Scott, D.A., Richardson, A.D., Seyfried, T.N., and Chiles, T.C. (2014). Glucose-dependent de novo lipogenesis in B lymphocytes: a requirement for atp-citrate lyase in lipopolysaccharide-induced differentiation. *J. Biol. Chem.* **289**, 7011–7024.

Fagarasan, S., Kawamoto, S., Kanagawa, O., and Suzuki, K. (2010). Adaptive immune regulation in the gut: T cell-dependent and T cell-independent IgA synthesis. *Annu. Rev. Immunol.* **28**, 243–273.

Fritsche, K.L. (2015). The science of fatty acids and inflammation. *Adv. Nutr.* **6**, 293S–301S.

Gally, F., Kosmider, B., Weaver, M.R., Pate, K.M., Hartshorn, K.L., and Oberley-Deegan, R.E. (2013). FABP5 deficiency enhances susceptibility to H1N1 influenza A virus-induced lung inflammation. *Am. J. Physiol. Lung Cell. Mol. Physiol.* **305**, L64–L72.

Gurzell, E.A., Teague, H., Harris, M., Clinthorne, J., Shaikh, S.R., and Fenton, J.I. (2013). DHA-enriched fish oil targets B cell lipid microdomains and enhances ex vivo and in vivo B cell function. *J. Leukoc. Biol.* **93**, 463–470.

Hertzel, A.V., Smith, L.A., Berg, A.H., Cline, G.W., Shulman, G.I., Scherer, P.E., and Bernlohr, D.A. (2006). Lipid metabolism and adipokine levels in fatty acid-binding protein null and transgenic mice. *Am. J. Physiol. Endocrinol. Metab.* **290**, E814–E823.

Hobeika, E., Thiemann, S., Storch, B., Jumaa, H., Nielsen, P.J., Pelanda, R., and Reth, M. (2006). Testing gene function early in the B cell lineage in mb1-cre mice. *Proc. Natl. Acad. Sci. U S A* **103**, 13789–13794.

Hotamisligil, G.S., and Bernlohr, D.A. (2015). Metabolic functions of FABPs—mechanisms and therapeutic implications. *Nat. Rev. Endocrinol.* **11**, 592–605.

Huang, G.M., Jiang, Q.H., Cai, C., Qu, M., and Shen, W. (2015). SCD1 negatively regulates autophagy-induced cell death in human hepatocellular carcinoma through inactivation of the AMPK signaling pathway. *Cancer Lett.* **358**, 180–190.

Iwata, T.N., Ramírez, J.A., Tsang, M., Park, H., Margineantu, D.H., Hockenbery, D.M., and Iritani, B.M. (2016). Conditional disruption of raptor reveals an essential role for mTORC1 in B cell development, survival, and metabolism. *J. Immunol.* **197**, 2250–2260.

Jones, D.D., Gaudette, B.T., Wilmore, J.R., Chernova, I., Bortnick, A., Weiss, B.M., and Allman, D. (2016). mTOR has distinct functions in generating versus sustaining humoral immunity. *J. Clin. Invest.* **126**, 4250–4261.

Kaestner, K.H., Ntambi, J.M., Kelly, T.J., Jr., and Lane, M.D. (1989). Differentiation-induced gene expression in 3T3-L1 preadipocytes. A second differentially expressed gene encoding stearoyl-CoA desaturase. *J. Biol. Chem.* **264**, 14755–14761.

Kedia-Mehta, N., and Finlay, D.K. (2019). Competition for nutrients and its role in controlling immune responses. *Nat. Commun.* **10**, 2123.

Kim, Y.C., and Guan, K.L. (2015). mTOR: a pharmacologic target for autophagy regulation. *J. Clin. Invest.* **125**, 25–32.

Kim, D., Perteau, G., Trapnell, C., Pimentel, H., Kelley, R., and Salzberg, S.L. (2013). TopHat2: accurate alignment of transcriptomes in the presence of insertions, deletions and gene fusions. *Genome Biol.* **14**, R36.

Kosaraju, R., Guesdon, W., Crouch, M.J., Teague, H.L., Sullivan, E.M., Karlsson, E.A., Schultz-Cherry, S., Gowdy, K., Bridges, L.C., Reese, L.R., et al. (2017). B cell activity is impaired in human and mouse obesity and is responsive to an essential fatty acid upon murine influenza infection. *J. Immunol.* **198**, 4738–4752.

Koutsari, C., Ali, A.H., Mundi, M.S., and Jensen, M.D. (2013). Measuring plasma fatty acid oxidation with intravenous bolus injection of 3H- and 14C-fatty acid. *J. Lipid Res.* **54**, 254–264.

Kurmi, K., Hitosugi, S., Wiese, E.K., Boakye-Agyeman, F., Gonsalves, W.I., Lou, Z., Karnitz, L.M., Goetz, M.P., and Hitosugi, T. (2018). Carnitine palmitoyltransferase 1A has a lysine succinyltransferase activity. *Cell Rep.* **22**, 1365–1373.

Le, A., Lane, A.N., Hamaker, M., Bose, S., Gou, A., Barbi, J., Tsukamoto, T., Rojas, C.J., Slusher, B.S., Zhang, H., et al. (2012). Glucose-independent glutamine metabolism via TCA cycling for proliferation and survival in B cells. *Cell Metab.* **15**, 110–121.

Lee, K., Heffington, L., Jellusova, J., Nam, K.T., Raybuck, A., Cho, S.H., Thomas, J.W., Rickert, R.C., and Boothby, M. (2013). Requirement for Rictor in homeostasis and function of mature B lymphoid cells. *Blood* **122**, 2369–2379.

Miyazaki, M., Kim, Y.C., and Ntambi, J.M. (2001a). A lipogenic diet in mice with a disruption of the stearoyl-CoA desaturase 1 gene reveals a stringent

requirement of endogenous monounsaturated fatty acids for triglyceride synthesis. *J. Lipid Res.* **42**, 1018–1024.

Miyazaki, M., Man, W.C., and Ntambi, J.M. (2001b). Targeted disruption of stearoyl-CoA desaturase1 gene in mice causes atrophy of sebaceous and meibomian glands and depletion of wax esters in the eyelid. *J. Nutr.* **131**, 2260–2268.

Miyazaki, M., Flowers, M.T., Sampath, H., Chu, K., Otzelberger, C., Liu, X., and Ntambi, J.M. (2007). Hepatic stearoyl-CoA desaturase-1 deficiency protects mice from carbohydrate-induced adiposity and hepatic steatosis. *Cell Metab.* **6**, 484–496.

Mizushima, N., Yoshimori, T., and Ohsumi, Y. (2011). The role of Atg proteins in autophagosome formation. *Annu. Rev. Cell Dev. Biol.* **27**, 107–132.

Ntambi, J.M., Miyazaki, M., Stoehr, J.P., Lan, H., Kendzioriski, C.M., Yandell, B.S., Song, Y., Cohen, P., Friedman, J.M., and Attie, A.D. (2002). Loss of stearoyl-CoA desaturase-1 function protects mice against adiposity. *Proc. Natl. Acad. Sci. U S A* **99**, 11482–11486.

O’Sullivan, D., van der Windt, G.J., Huang, S.C., Curtis, J.D., Chang, C.H., Buck, M.D., Qiu, J., Smith, A.M., Lam, W.Y., DiPlato, L.M., et al. (2014). Memory CD8(+) T cells use cell-intrinsic lipolysis to support the metabolic programming necessary for development. *Immunity* **41**, 75–88.

Ogasawara, Y., Itakura, E., Kono, N., Mizushima, N., Arai, H., Nara, A., Mizukami, T., and Yamamoto, A. (2014). Stearoyl-CoA desaturase 1 activity is required for autophagosome formation. *J. Biol. Chem.* **289**, 23938–23950.

Persson, X.M., Blachnio-Zabielska, A.U., and Jensen, M.D. (2010). Rapid measurement of plasma free fatty acid concentration and isotopic enrichment using LC/MS. *J. Lipid Res.* **51**, 2761–2765.

Ramon, S., Gao, F., Serhan, C.N., and Phipps, R.P. (2012). Specialized proresolving mediators enhance human B cell differentiation to antibody-secreting cells. *J. Immunol.* **189**, 1036–1042.

Ramon, S., Baker, S.F., Sahler, J.M., Kim, N., Feldsott, E.A., Serhan, C.N., Martínez-Sobrido, L., Topham, D.J., and Phipps, R.P. (2014). The specialized proresolving mediator 17-HDHA enhances the antibody-mediated immune response against influenza virus: a new class of adjuvant? *J. Immunol.* **193**, 6031–6040.

Rangel-Moreno, J., Carragher, D.M., Misra, R.S., Kusser, K., Hartson, L., Moquin, A., Lund, F.E., and Randall, T.D. (2008). B cells promote resistance to heterosubtypic strains of influenza via multiple mechanisms. *J. Immunol.* **180**, 454–463.

Raybuck, A.L., Cho, S.H., Li, J., Rogers, M.C., Lee, K., Williams, C.L., Shlomchik, M., Thomas, J.W., Chen, J., Williams, J.V., and Boothby, M.R. (2018). B cell-intrinsic mTORC1 promotes germinal center-defining transcription factor gene expression, somatic hypermutation, and memory B cell generation in humoral immunity. *J. Immunol.* **200**, 2627–2639.

Rickert, R.C., Roes, J., and Rajewsky, K. (1997). B lymphocyte-specific, Cre-mediated mutagenesis in mice. *Nucleic Acids Res.* **25**, 1317–1318.

Robinson, M.D., McCarthy, D.J., and Smyth, G.K. (2010). edgeR: a Bioconductor package for differential expression analysis of digital gene expression data. *Bioinformatics* **26**, 139–140.

Roper, R.L., Brown, D.M., and Phipps, R.P. (1995). Prostaglandin E2 promotes B lymphocyte Ig isotype switching to IgE. *J. Immunol.* **154**, 162–170.

Rytter, M.J., Kolte, L., Briend, A., Friis, H., and Christensen, V.B. (2014). The immune system in children with malnutrition—a systematic review. *PLoS ONE* **9**, e105017.

Siegemund, S., Shepherd, J., Xiao, C., and Sauer, K. (2015). hCD2-iCre and Vav-iCre mediated gene recombination patterns in murine hematopoietic cells. *PLoS ONE* **10**, e0124661.

Son, Y.M., Cheon, I.S., Goplen, N.P., Dent, A.L., and Sun, J. (2020). Inhibition of stearoyl-CoA desaturases suppresses follicular help T- and germinal center B- cell responses. *Eur. J. Immunol.* **50**, 1067–1077.

Tan, S.H., Shui, G., Zhou, J., Shi, Y., Huang, J., Xia, D., Wenk, M.R., and Shen, H.M. (2014). Critical role of SCD1 in autophagy regulation via lipogenesis and lipid rafts-coupled AKT-FOXO1 signaling pathway. *Autophagy* **10**, 226–242.

von Roemeling, C.A., Caulfield, T.R., Marlow, L., Bok, I., Wen, J., Miller, J.L., Hughes, R., Hazlehurst, L., Pinkerton, A.B., Radisky, D.C., et al. (2017). Accelerated bottom-up drug design platform enables the discovery of novel stearoyl-CoA desaturase 1 inhibitors for cancer therapy. *Oncotarget* **9**, 3–20.

Wang, R., Dillon, C.P., Shi, L.Z., Milasta, S., Carter, R., Finkelstein, D., McCormick, L.L., Fitzgerald, P., Chi, H., Munger, J., and Green, D.R. (2011). The transcription factor Myc controls metabolic reprogramming upon T lymphocyte activation. *Immunity* **35**, 871–882.

Wang, L., Wang, S., and Li, W. (2012). RSeQC: quality control of RNA-seq experiments. *Bioinformatics* **28**, 2184–2185.

Waters, L.R., Ahsan, F.M., Wolf, D.M., Shirihai, O., and Teitell, M.A. (2018). Initial B cell activation induces metabolic reprogramming and mitochondrial remodeling. *iScience* **5**, 99–109.

Wei, Y., Wang, D., Topczewski, F., and Pagliassotti, M.J. (2006). Saturated fatty acids induce endoplasmic reticulum stress and apoptosis independently of ceramide in liver cells. *Am. J. Physiol. Endocrinol. Metab.* **291**, E275–E281.

Weisel, F.J., Mullett, S.J., Elsner, R.A., Menk, A.V., Trivedi, N., Luo, W., Wikenheiser, D., Hawse, W.F., Chikina, M., Smita, S., et al. (2020). Germinal center B cells selectively oxidize fatty acids for energy while conducting minimal glycolysis. *Nat. Immunol.* **21**, 331–342.

Zeng, H., Yang, K., Cloer, C., Neale, G., Vogel, P., and Chi, H. (2013). mTORC1 couples immune signals and metabolic programming to establish T(reg)-cell function. *Nature* **499**, 485–490.

Zeng, H., Cohen, S., Guy, C., Shrestha, S., Neale, G., Brown, S.A., Cloer, C., Kishton, R.J., Gao, X., Youngblood, B., et al. (2016). mTORC1 and mTORC2 kinase signaling and glucose metabolism drive follicular helper T cell differentiation. *Immunity* **45**, 540–554.

Zeng, H., Yu, M., Tan, H., Li, Y., Su, W., Shi, H., Dhungana, Y., Guy, C., Neale, G., Cloer, C., et al. (2018). Discrete roles and bifurcation of PTEN signaling and mTORC1-mediated anabolic metabolism underlie IL-7-driven B lymphopoiesis. *Sci. Adv.* **4**, eaar5701.

## STAR★METHODS

### KEY RESOURCES TABLE

| REAGENT or RESOURCE                                               | SOURCE                                        | IDENTIFIER                         |
|-------------------------------------------------------------------|-----------------------------------------------|------------------------------------|
| <b>Antibodies</b>                                                 |                                               |                                    |
| AffiniPure F(ab') <sub>2</sub> Fragment Goat Anti-Mouse IgM       | Jackson ImmunoResearch                        | Cat.#115-006-075; RRID:AB_2338474  |
| InVivoMab anti-mouse CD40 antibody                                | Bio X Cell                                    | Cat.#BE0016-2; RRID:AB_1107647     |
| InVivoMab anti-human CD40 antibody                                | Bio X Cell                                    | Cat.#BE0189; RRID: AB_10950314     |
| Rabbit polyclonal anti-p-S6 (Ser235/Ser236, D57.2.2E)             | Cell Signaling                                | Cat.#4858S; RRID: AB_916156        |
| Rabbit polyclonal anti-p-p70 S6 kinase (Thr389, 108D2)            | Cell Signaling                                | Cat.#9205S; RRID: AB_330944        |
| Rat anti-AID (EK2 5G9)                                            | Cell Signaling                                | Cat.#4959; RRID: AB_10692771       |
| Rabbit polyclonal anti-LC3B                                       | NOVUS                                         | Cat.#NB600-1384 ; RRID: AB_669581  |
| Mouse anti-β-actin (13E5), Anti-SCD2 Antibody (H-12)              | Sigma-Aldrich                                 | Cat.#A5441; RRID: AB_476744        |
| Alexa 488 anti-mouse IgG1 (RMG1-1)                                | Santa Cruz                                    | Cat.#sc-518034                     |
| PE/Cy7 anti-mouse CD19 (ID3)                                      | Biolegend                                     | Cat.# 406625 ; RRID: AB_2715988    |
| Anti-mouse B220-BV605 (RA3-6B2)                                   | Biolegend                                     | Cat.#115520 ; RRID: AB_313655      |
| FITC anti-mouse CD4 (GK1.5)                                       | Biolegend                                     | Cat.#103244; RRID: AB_2563312      |
| APC-Cyanine7 Anti-Mouse CD8a (53-6.7)                             | Biolegend                                     | Cat.#100510; RRID: AB_312713       |
| FITC anti-mouse CD25 (PC61)                                       | Tonbo Biosciences                             | Cat.# 25-0081; RRID:AB_2621623     |
| AF647 Anti-mouse CD95 (Jo2)                                       | Tonbo Biosciences                             | Cat.# 35-0251; RRID:AB_2621685     |
| BV711 Anti-mouse CD138 (Syndecan-1)                               | BD Biosciences                                | Cat.# 563647; RRID: AB_2738346     |
| APC Anti-mouse IgD (11-26c.2a)                                    | Biolegend                                     | Cat.#142519; RRID:AB_2562571       |
| PE-Cy7 anti-mouse PD1 (J43)                                       | Biolegend                                     | Cat.# 405714 ; RRID:AB_10643423    |
| eFluor 450 anti-mouse IgM (II/41)                                 | ThermoFisher                                  | Cat.# 25-9985-82; RRID:AB_10853805 |
| Pacific Blue anti-mouse/human GL-7 (GL-7)                         | ThermoFisher                                  | Cat.# 48-5790-82; RRID: AB_2574073 |
| BV421 Anti-Bcl6 (K112-91)                                         | Biolegend                                     | Cat.# 144614; RRID:AB_2563292      |
| BV605 Anti-mouse CD25 (PC61)                                      | BD Biosciences                                | Cat.# 563363; RRID:AB_2738159      |
| FITC Anti-mouse IgA (mA-6E1)                                      | Biolegend                                     | Cat.#102036; RRID:AB_2563059       |
| PE Anti-mouse CD43 (S7)                                           | ThermoFisher                                  | Cat.#11-4204-82; RRID: AB_465221   |
| APC anti-human CD80 (B7-1) (2D10.4)                               | BD Biosciences                                | Cat.#553271; RRID: AB_394748       |
| PE anti-human CD86 (B7-2) (IT2.2)                                 | Tonbo Biosciences                             | Cat.#20-0809; RRID: AB_2076147     |
| Biotinylated anti-mouse CXCR5 (2G8)                               | Tonbo Biosciences                             | Cat.#50-0869; RRID: AB_2621776     |
| PE Phospho-S6 Ribosomal Protein (Ser235/236) (D57.2.2E)           | BD Biosciences                                | Cat.#551960; RRID: AB_394301       |
| Mouse IgG-heavy and light chain Antibody HRP conjugated           | Cell Signaling                                | Cat.#5316S ; RRID: AB_10694989     |
| Mouse IgM Antibody HRP conjugated                                 | Bethyl Laboratories                           | Cat.#A90-137P; RRID: AB_1211460    |
| Rat Anti-Mouse IgG <sub>1</sub> -HRP                              | Bethyl Laboratories                           | Cat.#A90-101P; RRID: AB_67189      |
| Goat Anti-Mouse IgG <sub>2c</sub> , Human/Bovine/Horse SP ads-HRP | SouthernBiotech                               | Cat.#1144-05; RRID:AB_2734757      |
|                                                                   | SouthernBiotech                               | Cat.#1077-05; RRID:AB_2794452      |
| <b>Bacterial and Virus Strains</b>                                |                                               |                                    |
| influenza A/PR8 strain                                            | Gift from Jie Sun, Mayo Clinic Rochester, USA | N/A                                |
| <b>Biological Samples</b>                                         |                                               |                                    |
| PBMCs from healthy subjects                                       | Mayo Clinic Blood Donor                       | N/A                                |

(Continued on next page)

| REAGENT or RESOURCE                                                                               | SOURCE                                                   | IDENTIFIER        |
|---------------------------------------------------------------------------------------------------|----------------------------------------------------------|-------------------|
| <b>Continued</b>                                                                                  |                                                          |                   |
| <b>Chemicals, Peptides, and Recombinant Proteins</b>                                              |                                                          |                   |
| NP-OVAL (Ovalbumin)                                                                               | BioSearch Technologies                                   | Cat.#N-5051       |
| Aluminum potassium sulfate dodecahydrate (KAL(SO <sub>4</sub> ) <sub>2</sub> .12H <sub>2</sub> O) | Sigma                                                    | Cat.#A6435        |
| Ficoll-Paque PLUS density gradient medium                                                         | GE Healthcare                                            | Cat.#45-001-749   |
| SSI-4 and control diet                                                                            | Gift from John A. Copland, III, Mayo Clinic Florida, USA | N/A               |
| SSI-4, SCD inhibitor                                                                              | Gift from John A. Copland, III, Mayo Clinic Florida, USA | N/A               |
| A939572                                                                                           | Sigma-Aldrich                                            | Cat.#SML2356      |
| Stearoyl-CoA Desaturase 1 Inhibitor, MF-438                                                       | Sigma-Aldrich                                            | Cat.# 569406      |
| LPS ( <i>Escherichia coli</i> strain 055: B5)                                                     | Sigma-Aldrich                                            | Cat.#L2637        |
| recombinant mouse IL-4 cytokine                                                                   | Tonbo Bioscience                                         | Cat.# 404-ML-010  |
| Recombinant Mouse IL-5 (Carrier-free)                                                             | Tonbo Bioscience                                         | Cat.#21-8051      |
| recombinant human cytokine IL-10                                                                  | Peprotech                                                | Cat.# 200-10      |
| recombinant human cytokine IL-4                                                                   | Biolegend                                                | Cat.#574004       |
| recombinant human cytokine IL-15                                                                  | Peprotech                                                | Cat.# 200-15      |
| recombinant human cytokine IL-2                                                                   | TECIN                                                    | Cat.#23-6019      |
| Oleic acid-Albumin from bovine serum                                                              | Sigma-Aldrich                                            | Cat.#O3008        |
| Palmitoleic acid                                                                                  | NU-CHEK PREP, INC                                        | Cat.#U-40-A       |
| Palmitic acid                                                                                     | NU-CHEK PREP, INC                                        | Cat.#N-16-A       |
| Stearic acid                                                                                      | NU-CHEK PREP, INC                                        | Cat.#N-18-A       |
| Bovine Serum Albumin Fraction V, heat shock, fatty acid free                                      | Sigma-Aldrich                                            | Cat.#3117057001   |
| Thymidine, [methyl- <sup>3</sup> H]                                                               | PerkinElmer                                              | Cat.#NET027W001MC |
| D-Glucose (U- <sup>13</sup> C <sub>6</sub> , 99%)                                                 | Cambridge Isotope Laboratories                           | Cat.#CLM-1396-2   |
| Oleic Acid, [9,10- <sup>3</sup> H(N)]                                                             | Perkin Elmer                                             | Cat.# NET289001MC |
| [U- <sup>13</sup> C]-oleic acid                                                                   | Larodan                                                  | Cat.# 78-1811     |
| (+)-Etomoxir (sodium salt)                                                                        | Cayman                                                   | Cat.# 11969       |
| Cell-Tak Cell and Tissue Adhesive                                                                 | Fisher Scientific                                        | Cat.#354240       |
| Oligomycin                                                                                        | Sigma-Aldrich                                            | Cat.#495455       |
| Carbonyl cyanide 4-(trifluoromethoxy) phenylhydrazone (FCCP)                                      | Sigma-Aldrich                                            | Cat.#C2920        |
| Rotenone                                                                                          | Sigma-Aldrich                                            | Cat.#R8875        |
| Antimycin A                                                                                       | Sigma-Aldrich                                            | Cat.#A8674        |
| 2-deoxy-D-Glucose (2-DG)                                                                          | Cayman Chemical                                          | Cat.#14325        |
| Seahorse XF 1M Glucose solution                                                                   | Agilent Technologies                                     | Cat.#103577       |
| 7AAD                                                                                              | ThermoFisher                                             | Cat.# A1310       |
| Fixable Dye Ghost 510                                                                             | Tonbo Bioscience                                         | Cat.#13-0870      |
| CellTrace Violet proliferation dye                                                                | Thermo Fisher Scientific                                 | Cat.# C34557      |
| Torin 1                                                                                           | Cayman                                                   | Cat.#10997        |
| rapamycin (mTOR inhibitor)                                                                        | LC Laboratories                                          | Cat.#553210       |
| SuperSignal West Pico PLUS Chemiluminescent Substrate                                             | Fisher Scientific                                        | Cat.#34580        |
| NP-PE (Phycoerythrin)                                                                             | BioSearch Technologies                                   | Cat.#N-5070-1     |
| NP(23)-BSA                                                                                        | BioSearch Technologies                                   | Cat.#N-5050H      |
| RT All-in-One Master Mix, 5X                                                                      | Lamda Biotech                                            | Cat.# G208-100    |

(Continued on next page)



**Continued**

| REAGENT or RESOURCE | SOURCE          | IDENTIFIER     |
|---------------------|-----------------|----------------|
| 3-Methyladenine     | Cayman          | Cat.#13242     |
| Wortmannin          | Cayman          | Cat.# 10010591 |
| Tamoxifen           | Cayman chemical | Cat.# 13258    |

**Critical Commercial Assays**

|                                                   |                             |                  |
|---------------------------------------------------|-----------------------------|------------------|
| RNeasy Micro Kit                                  | QIAGEN                      | Cat.#74004       |
| Mouse CD19 Microbeads                             | Miltenyi                    | Cat.#130-052-201 |
| EasySep Mouse B Cell Isolation Kit                | StemCell Technologies, Inc. | Cat.#19854       |
| EasySep Human naive B cell negative selection kit | StemCell Technologies, Inc. | Cat.# 17254      |

**Deposited Data**

|                              |            |                |
|------------------------------|------------|----------------|
| Raw and analyzed RNAseq data | This paper | GEO: GSE162460 |
|------------------------------|------------|----------------|

**Experimental Models: Organisms/Strains**

|                                                                          |                                                                     |                  |
|--------------------------------------------------------------------------|---------------------------------------------------------------------|------------------|
| Mouse:C57BL/6                                                            | Jackson Laboratory                                                  | Stock No:000664  |
| Mouse: <i>Rag1</i> <sup>-/-</sup>                                        | Jackson Laboratory                                                  | Stock No:002216  |
| Mouse: <i>Cre-ERT2</i>                                                   | Gift from Thomas Ludwig, Stanford University, USA                   | N/A              |
| Mouse: <i>Cd2-iCre</i>                                                   | Jackson Laboratory                                                  | Stock No: 008520 |
| Mouse: <i>Cd19-Cre</i>                                                   | Jackson Laboratory                                                  | Stock No: 004126 |
| Mouse: <i>Scd1</i> <sup>flox/flox</sup> <i>Scd2</i> <sup>flox/flox</sup> | Gift from Makoto Miyazaki, University of Colorado, USA              | N/A              |
| Mouse:OT-II transgenic                                                   | Gift from Jie Sun, Mayo Clinic Rochester, USA                       | N/A              |
| Mouse:GFP-LC3                                                            | Gift from Douglas Green, St. Jude Children's Research Hospital, USA | N/A              |

**Oligonucleotides**

|                                              |            |     |
|----------------------------------------------|------------|-----|
| CpG ODN2006 5'-TCGTCGTTTGTGCG TTTTGTGCGTT-3' | IDT        | N/A |
| All primers listed in Table S2               | This paper | N/A |

**Software and Algorithms**

|            |                      |                                                                                                                                                                                                                                                                                         |
|------------|----------------------|-----------------------------------------------------------------------------------------------------------------------------------------------------------------------------------------------------------------------------------------------------------------------------------------|
| Rstudio    | Rstudio              | <a href="https://rstudio.com/">https://rstudio.com/</a>                                                                                                                                                                                                                                 |
| ImageJ     | NIH                  | <a href="https://imagej.nih.gov/ij/">https://imagej.nih.gov/ij/</a>                                                                                                                                                                                                                     |
| Flowjo v10 | FlowJo               | <a href="https://www.flowjo.com/">https://www.flowjo.com/</a>                                                                                                                                                                                                                           |
| Prism 8    | GraphPad             | <a href="https://www.graphpad.com">https://www.graphpad.com</a>                                                                                                                                                                                                                         |
| Wave       | Agilent Technologies | <a href="https://www.agilent.com/en/product/cell-analysis/real-time-cell-metabolic-analysis/xf-software/seahorse-wave-desktop-software-740897">https://www.agilent.com/en/product/cell-analysis/real-time-cell-metabolic-analysis/xf-software/seahorse-wave-desktop-software-740897</a> |

**RESOURCE AVAILABILITY**

**Lead Contact**

Further information and requests for reagents may be directed to and will be fulfilled by the corresponding author Hu Zeng (zeng.hu1@mayo.edu).

**Material Availability**

This study did not generate new unique reagents.

**Data and Code Availability**

The datasets generated during this study are available at the Gene Expression Omnibus (accession number GSE162460).

## EXPERIMENTAL MODEL AND SUBJECT DETAILS

### Human B cell

This study was conducted with approval from the institutional review boards of Mayo Clinic, Rochester. Peripheral blood mononuclear cells were isolated from apheresis collection of platelets. Briefly, blood was diluted 1:10 using PBS. The diluted blood was then overlaid with Ficoll-Paque PLUS density gradient medium. The gradient was centrifuged at 400 g with no brake for 25 min at room temperature. The interphase layer was collected, washed with PBS with 0.1% BSA/2 mM of EDTA. Naive B cells were enriched using Human naive B cell negative selection kit.

### Mice

*Scd* floxed mice were from Dr. Makoto Miyazaki, University of Colorado School of Medicine. Mice were crossed with *Cre-ERT2* (Zeng et al., 2013), *Cd2-iCre* (Zeng et al., 2018) or *Cd19-Cre* (Rickert et al., 1997) transgenic mice (Jackson Laboratory). C57BL/6 and *Rag1*<sup>-/-</sup> mice were purchased from the Jackson Laboratory. Spleen cells from GFP-LC3 reporter mice were a gift from Dr. Douglas Green, St. Jude Children's Research Hospital. All mice were used at 2-4 months old. Both male and female mice were used. Mice of the same sex were used in a single experiment. For *in vivo* SCD inhibition experiments, animals were fed on chow containing SSI-4 (30 mg/kg) or otherwise equivalent control chow, which were gifts from Dr. John A. Copland, III. One day prior to immunization, mice were fed with SSI-4 and control chow for 1 week. Antigen for immunization was prepared by mixing 100 μg NP-OVA, 10% KAL(SO<sub>4</sub>)<sub>2</sub> dissolved in PBS at a ratio of 1:1, together with 10 μg LPS at pH 7 (Zeng et al., 2016). Mice were immunized intraperitoneally. Transfer model were generated by transferring 5 × 10<sup>6</sup> B cells isolated from *Cre*<sup>ER</sup>*Scd1*<sup>fl/fl</sup>*Scd2*<sup>fl/fl</sup> or *Cre*<sup>ER</sup>*Scd1*<sup>+/+</sup>*Scd2*<sup>+/+</sup> treated with tamoxifen for 4 consecutive days, mixed with 4 × 10<sup>6</sup> CD4 T and 1 × 10<sup>6</sup> OT-II transgenic T cells, into *Rag1*<sup>-/-</sup> mice. Three weeks after first immunization with NP-OVA/Alum, mice were boosted with NP-OVA/Alum. The mice were sacrificed one week after second immunization.

For influenza virus infection, influenza A/PR8 strain (60 pfu/mouse) were diluted in FBS-free DMEM media on ice and inoculated in anesthetized mice through intranasal route. Sera were collected before and two weeks after infection for fatty acid component measurement. The mice were fed with control chow or SSI-4 chow for 1 week following influenza infection before switching to regular diet. The mediastinal lymph nodes were analyzed for GC B cell formation and Tfh differentiation. Mice were bred and maintained under specific pathogen-free conditions in Department of Comparative Medicine of Mayo Clinic with Institutional Animal Care and Use Committee approval.

## METHOD DETAILS

### RNA-seq

RNA from isolated fresh B cells and activated B cells was extracted using a RNeasy Micro kit. After quality control, high quality total RNA was used to generate the RNA sequencing library. Paired-end RNA-seq reads were aligned to the mouse reference genome (mm10) using a spliced-aware reads mapper Tophat2 (v2.0.6) (Kim et al., 2013). Pre- and post-alignment quality controls, gene level raw read count and normalized read count (i.e., FPKM) were performed using RSeQC package (v2.3.6) with NCBI mouse RefSeq gene model (Wang et al., 2012). Differential gene expression analyses were conducted using edgeR (version 3.6.8) and the built-in "TMM" (trimmed mean of M-values) normalization method were used (Robinson et al., 2010). The criteria for selection of significant differentially expressed genes were: |log<sub>2</sub> fold change| >= 1.0 and *p* value ≤ 0.001.

### Immune cell Purification and Culture

Mouse B cells were isolated from spleen and peripheral lymph nodes using CD19 Microbeads or Mouse B cell Isolation Kit. B cells were stimulated with LPS (10 μg/mL) and recombinant IL-4 (10 ng/mL) with or without SSI-4, and proliferation was measured by dilution of CellTrace Violet proliferation dye. B cells were also stimulated with anti-IgM (10 μg/mL), anti-CD40 (10 μg/mL) and IL-4, or TLR ligand CpG (2.5 μM), recombinant IL-4 and IL-5 (10 ng/mL). To test the function of monounsaturated and saturated fatty acids, B cells were activated in presence of exogenous fatty acid-BSA conjugate. Palmitoleic acid, palmitic acid, and stearic acid were conjugated with fatty acid free BSA as previously described (Wang et al., 2011). Human B cells were activated with CpG OND2006 (2.5 μM), recombinant human cytokine IL-10 (50 μg/mL), IL-15 (10 ng/mL), IL-4 (10 ng/mL), IL-2 (10 unit/mL) and anti-human CD40 (1 μg/mL). Human B cell proliferation was measured by <sup>3</sup>[H]-thymidine incorporation (1 μCi/mL).

### Non-esterified free fatty acids (NEFAs) and Total Fatty Acid Composition

Fatty acids and total fatty acid composition were measured against a standard curve on a triple quadrupole mass spectrometer coupled with an Ultra Pressure Liquid Chromatography system (LC/MS) as previously described. Briefly, the cell pellets were spiked with internal standard prior to extraction with tert-Butyl Methyl Ether (MTBE). Roughly 25% of the sample was dried down, hydrolyzed, re-extracted and brought up in running buffer for the analysis of total fatty acid composition. The remaining portion of the extract was dried down and brought up in running buffer prior to injecting on the LC/MS for the NEFA measurement. Data acquisition was performed under negative electrospray ionization condition.

### Mass spectrometer measurement of serum NEFA using liquid chromatography system

Fatty acids were measured against a standard curve on a Thermo Quantum Ultra triple quadrupole connected to a Waters Acquity Ultra high-pressure liquid chromatography system (LC/MS) as previously described. Briefly, 50  $\mu$ L of serum was spiked with internal standard prior to extraction. The extracts were dried down and brought up in running buffer prior to injecting on the LC/MS. Data acquisition was performed under negative electrospray ionization condition (Persson et al., 2010).

### NEFA isotopomer analysis

$5 \times 10^6$  activated B cells were washed with PBS and cultured in glucose-free medium RPMI medium containing 10% dialyzed FBS and uniformly labeled [ $U$ - $^{13}C$ ]-glucose (2 g/L) for 48 h. Cell pellets were lysed in  $1 \times$  PBS prior to lipid extraction. The extract was dried down and brought up in running buffer before underwent analysis on an Agilent 6550 iFunnel Q-TOF mass spectrometer/1290 Infinity liquid chromatographic system. A mixed standard containing 14 fatty acids was also run at the beginning and at the end of the sequence to generate retention time lock as well as unlabeled mass spectrum for each fatty acid. The mass spec was operating in negative electrospray ionization. Data was acquired in scan mode from 50-1700 m/z range. Data analysis was performed on Agilent Technologies software including Profinder, Mass Profiler Professional (MPP) and Vista Flux. The features extracted from the data files were aligned using Profinder and converted to a compound exchange file (CEF) format to import in the MPP. The list was filtered for frequency and abundance to identify features that are present in all samples and with high abundance. A library was created using mass, molecular formula, and retention time of these features and used in conjunction with the Vista Flux software to determine the presence of isotopologue in individual feature. Fatty acids displaying a presence of isotopic pattern were annotated using retention time lock, accurate mass, and the METLIN database with an error of 5 ppm.

### [9,10- $^3H$ ]-OA flux assay

OA oxidation was determined by measuring the detritiation of [9,10- $^3H$ ]-OA. Briefly, Isolated B cells were activated with LPS/IL-4 for 48 h with or without exogenous OA, and then washed with fresh medium. The activated B cells were treated with 40  $\mu$ M etomoxir for 1 h, and then incubated in 3  $\mu$ Ci of [9,10- $^3H$ ]-OA for 4 h. The whole cell culture was mixed with 50 mL of 5 N HCL to stop the reaction in a microcentrifuge tube. The tube was then placed in 20 mL scintillation vials containing 0.5 mL water with the vial capped and sealed.  $^3H_2O$  was separated from unmetabolized [9,10- $^3H$ ]-OA by evaporation diffusion for 24 h at room temperature. A control sample with [9,10- $^3H$ ]-OA containing medium alone (without B cells) was used to calculate background, which was subtracted from eventual scintillation reading.

### [U- $^{13}C$ ]-OA oxidation assay

OA oxidation activity was measured by monitoring the intracellular conversion rate of uniformly labeled  $^{13}C$  OA to [M+2, 4, 6]-labeled  $^{13}C$  citrate. B cells were activated with LPS/IL-4 for 48 h. The activated B cells were treated with 40  $\mu$ M etomoxir for 1 h, and then incubated in 100  $\mu$ M [U- $^{13}C$ ]-OA conjugated to BSA for other 6 h. The extent of isotopic  $^{13}C$  labeling was calculated by summing the percentage intensities of isotopologues of [M + 2, 4, 6]-labeled citrate after natural-abundance correction as previously performed (Kurmi et al., 2018). The extent of isotopic  $^{13}C$  labeling in citrate was further divided by percent isotopic enrichment of intracellular [U- $^{13}C$ ]-OA to determine the conversion rate of [U- $^{13}C$ ]-oleic acid to [M + 2, 4, 6]-labeled citrate in cells. OA and citrate were detected by GC-MS as TBDMS derivatives: oleic acid (m/z 339), [U- $^{13}C$ ]-OA (m/z 357), and citrate (m/z 459-465).

### Metabolic Assays

The bioenergetic activities were measured using a Seahorse XFe96 Analyzer. Briefly, equal number of live B cells were seeded at 200,000 cells/well on Cell-Tak (Corning) coated XFe96 plate with fresh XF media (Seahorse XF RPMI medium containing 10 mM glucose, 2 mM L-glutamine, and 1 mM sodium pyruvate, PH 7.4). OCR was measured in the presence of Oligomycin (1.5  $\mu$ M), FCCP (1.5  $\mu$ M), and Rotenone (1  $\mu$ M)/ Antimycin A (1  $\mu$ M) in Mito Stress assay. For ECAR measurement, B cells were seeded in XFe96 plate with fresh Seahorse XF RPMI medium and treated with glucose (10 mM), Oligomycin (1.5  $\mu$ M), and 2-DG (50 mM) in Glycolysis Stress assay.

### Electron microscopy

Cells were fixed in Truups fixative (pH 7.2) at 4°C overnight, spun down and the supernatant removed. They were re-suspended in 2% agarose which was allowed to cool and solidify. The cells in agarose were then post-fixed in 1% OsO<sub>4</sub>, dehydrated through a graded series of ethanol and embedded in Spurr resin. One hundred nm ultra-thin sections were mounted on 200-mesh copper grids, post-stained with lead citrate, and observed under a JEOL JEM-1400 transmission electron microscope at 80kV.

### Immunoblotting

Immunoblot was performed as previously described (Zeng et al., 2013). The membrane was blocked with TBST (0.1% Tween 20) containing 5% BSA for 1 h at room temperature. Primary antibodies included: anti-p-S6 (Ser235/Ser236, D57.2.2E), anti-p-p70 S6 kinase (Thr389, 108D2), anti-LC3B; anti-AID (EK2 5G9), anti- $\beta$ -actin (13E5), and anti-SCD2 (H-12). The band intensity of all the immunoblot was analyzed by ImageJ software.

### Quantitative Real-time PCR

For mRNA analysis, total mRNA was isolated from mouse and human B cells by RNeasy Micro kit (QIAGEN), reverse transcribed from mRNA to cDNA for subsequent real-time PCR analysis. *Scd1*, *Scd2*, *Fasn*, *Acaca*, *Chop*, *Atf4*, *Sqstm1* in mouse B cells and *Scd*, *Fasn*, *Acaca* expression in human B cells were with a Bio-Rad Realtime PCR system.  $\beta$ -actin expression was used as control. The primers information was provided in [Table S2](#).

### Flow Cytometry

Cells were stained in PBS containing 1% (w/v) bovine serum albumin on ice for 30 min, with anti-IgG1 (RMG1-1), anti-CD19 (ID3), anti-B220 (RA3-6B2), anti-CD4 (GK1.5), anti-CD8 $\alpha$  (53-6.7), anti-CD25 (PC16), anti-GL7 (GL-7), anti-CD138 (281-2), anti-IgD (11-26c.2a), anti-CD95 (Jo2), anti-PD-1 (J43), anti-IgM (II/41), and anti-CXCR5 (2G8). Antigen specific GC response was detected with PE-conjugated anti-NP tetramer. Cell viability was assessed using the Fixable Dye Ghost 510. Phosflow staining was performed using Phosflow Fix/Perm kit (BD Biosciences). Flow cytometry was performed on the LSR II, LSR Fortessa (BD Biosciences) or Attune NxT (Thermo Fisher) cytometers, and analysis was performed using FlowJo software.

### ELISA

For NP specific antibodies detection in sera, 96-well plates were coated with 2  $\mu$ g/mL NP<sub>23</sub>-BSA in PBS overnight. Plates were washed twice (0.05% Tween 20 in PBS), blocked with 5% blocking protein for 1 h, and washed twice, and serially diluted serum samples were added for 1.5 h at 37°C. Plates were washed and horseradish peroxidase (HRP)-conjugated detection antibodies for IgG, IgM and IgG1 were added for 1 h, followed by reaction with tetramethylbenzidine (TMB) substrate. Similarly, antibodies specific to influenza A/PR8 strain in sera were measured with influenza virus coated plate.

### QUANTIFICATION AND STATISTICAL ANALYSIS

Statistical analysis was performed using GraphPad Prism (version 8). P values were calculated with Student's t test, or one-way ANOVA (Tukey's Post Hoc test) for multiple groups comparison.  $p < 0.05$  was considered significant.

**Cell Reports, Volume 34**

**Supplemental Information**

**Stearoyl-CoA Desaturase-Mediated Monounsaturated**

**Fatty Acid Availability Supports Humoral Immunity**

**Xian Zhou, Xingxing Zhu, Chaofan Li, Yanfeng Li, Zhenqing Ye, Virginia Smith Shapiro, John A. Copland III, Taro Hitosugi, David A. Bernlohr, Jie Sun, and Hu Zeng**

## Figure S1, related to Figure 1

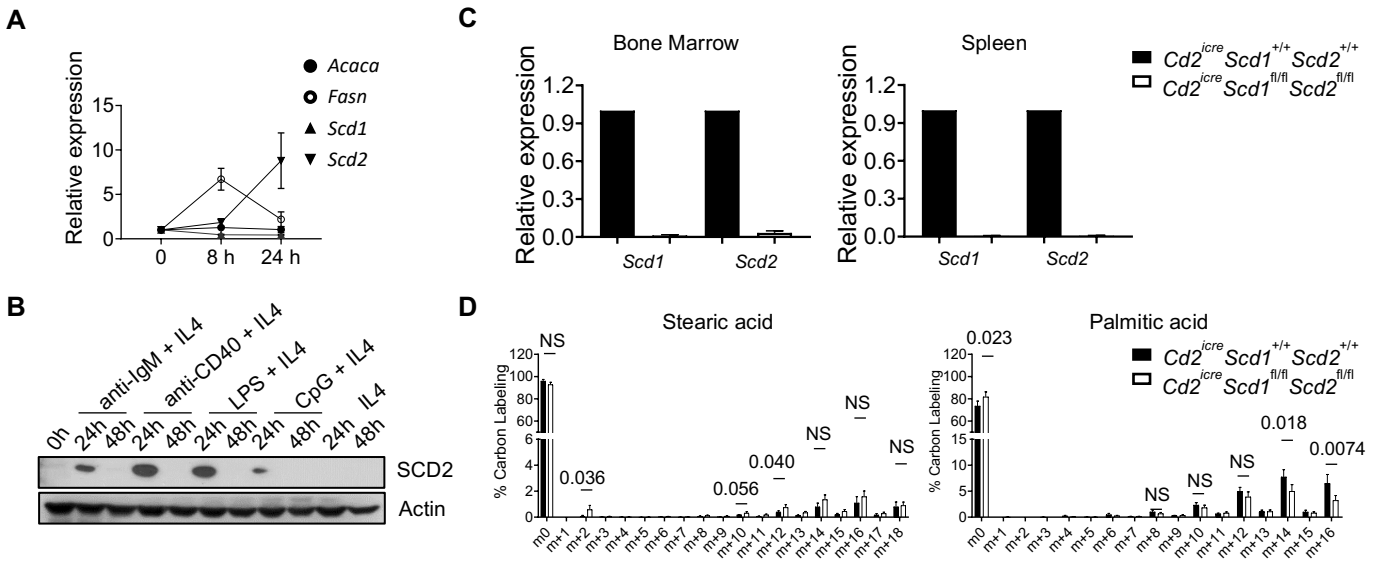

### Figure S1. B cell activation induces SCD activity and increases MUFA content, related to Figure 1

(A) Reverse transcription polymerase chain reaction (RT-PCR) analysis of *Acaca*, *Fasn*, *Scd1* and *Scd2* expression in murine B cells at 0, 8 and 24 h with LPS/IL-4 activation. (B) Immunoblot analysis of SCD2 in fresh isolated murine B cells, and B cells activated with anti-IgM (10  $\mu$ g/mL)/IL-4, anti-CD40 (10  $\mu$ g/mL)/IL-4, LPS (10  $\mu$ g/mL)/IL-4, CpG (2.5  $\mu$ M)/IL-4, or IL-4 alone at 24 and 48 h by immunoblot. (C) RT-PCR analysis of *Scd1*, and *Scd2* expression in both BM CD19<sup>+</sup> B and splenic total B cells isolated from WT or *Cd2<sup>iCre</sup>Scd1<sup>fl/fl</sup>Scd2<sup>fl/fl</sup>* mice. (D) Incorporation of <sup>13</sup>C labeled glucose into stearic acid (SA) and palmitic acid (PA) were measured by LC-MS/MS in activated B cell isolated from WT or *Cd2<sup>iCre</sup>Scd1<sup>fl/fl</sup>Scd2<sup>fl/fl</sup>* mice (n = 3). *p* was calculated with Student's *t* test (D). NS, not significant. Data were pooled from 5 (A) and represent 2 (D) independent experiments. Error bars represent SEM.

**Figure S2, related to Figure 2**

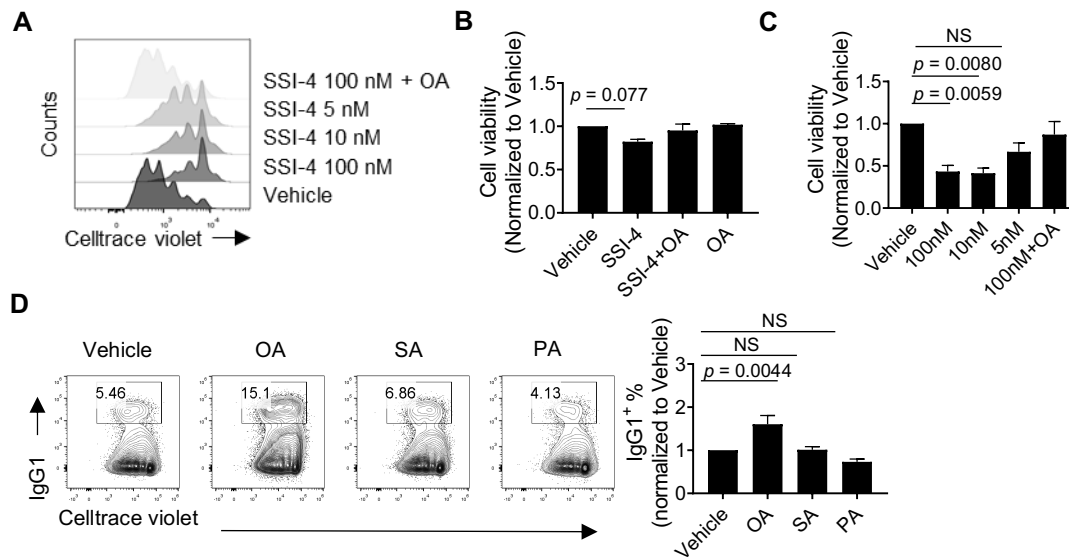

**Figure S2. MUFAs promote B cell proliferation and survival in vitro, related to Figure 2**

(A) Cell proliferation of murine B cells stimulated with LPS/IL-4/IL-5 in presence of 5, 10, and 100 nM SSI-4, or 100 nM SSI-4 plus OA. (B) The cell viability of murine B cells activated with LPS/IL-4 in the presence of vehicle, 100 nM SSI-4, SSI-4 plus OA, and OA alone for 48 h. (C) The cell viability of murine B cells activated with LPS/IL-4 in presence of different doses of SSI-4, or SSI-4 plus exogenous OA for 72 h. (D) Flow cytometry analysis of murine B cell proliferation and class switch when treated with OA, SA and PA. Right, the frequencies of IgG1<sup>+</sup> B cell activated with LPS/IL-4 in presence of OA, PA and SA. The percentages were normalized to vehicle (BSA) group.  $p$  value was calculated with one-way ANOVA (B-D). NS, not significant. Results were representative of 3 (A) and pooled from 4 (B-D) independent experiments. Error bars represent SEM.

**Figure S3, related to Figure 3**

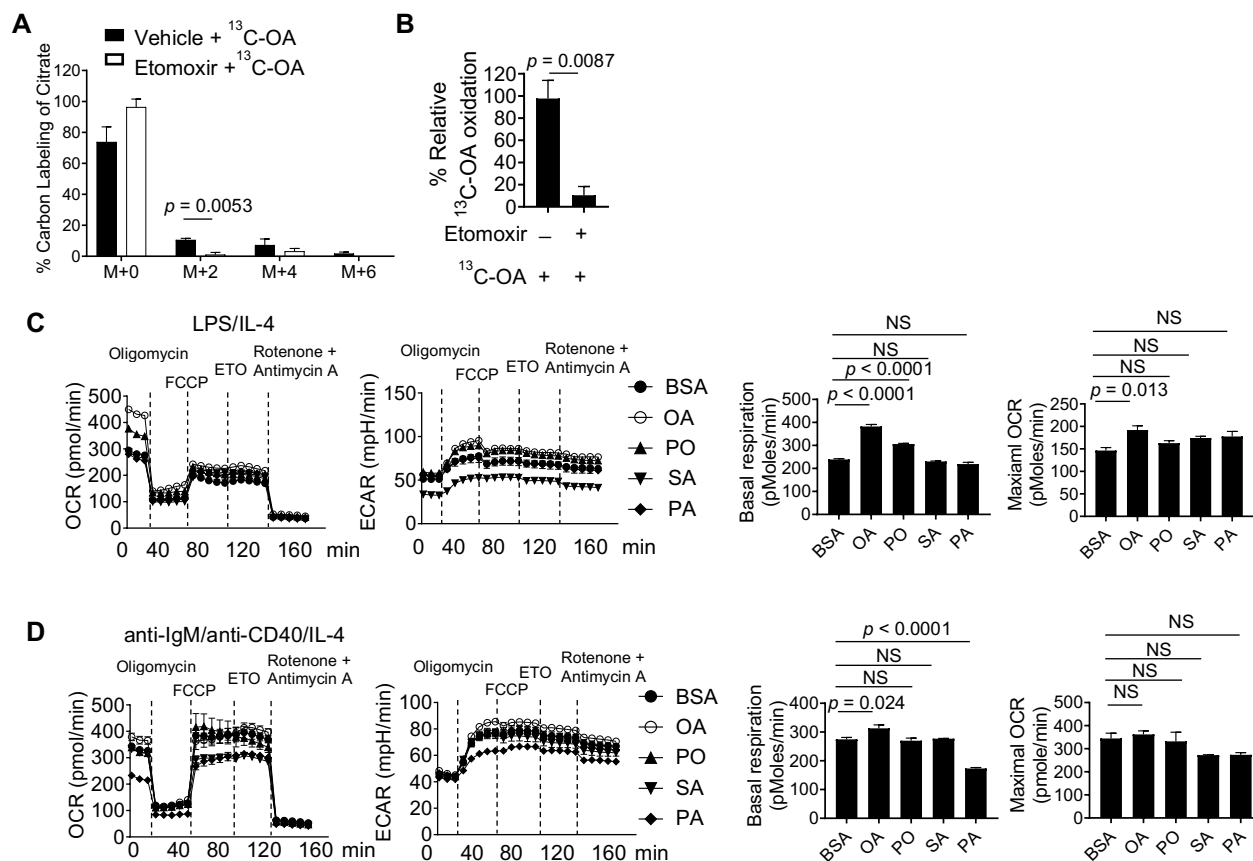

**Figure S3. MUFAs maintains B cell metabolic fitness, related to Figure 3**

(A, B) The U-<sup>13</sup>C-OA tracing assay on murine activated B cells. (A) Isotopomer tracing of U-<sup>13</sup>C-OA in activated B cells. (A) The conversion of U-<sup>13</sup>C-OA to [M + 2, 4, 6]-<sup>13</sup>C labeled citrate, with or without etomoxir treatment. (B) The summary of percentage of relative U-<sup>13</sup>C-OA oxidation (normalized to etomoxir untreated sample). (C, D) Oxygen consumption rate (OCR) was measured with a Seahorse XFe96 analyzer using LPS/IL-4 (C) and anti-IgM/anti-CD40/IL-4 (D) activated murine B cells in the presence of BSA, OA, PO, SA and PA for 48 h with a MitoStress assay kit. Basal respiration and maximal OCR of either stimulation were summarized. *p* value was calculated with Student's *t* test (A, B) and one-way ANOVA (C, D). NS, not significant. Data were representative of 3 (C) and 2 (D) independent experiments. Error bars represent SEM.



**Figure S4, related to Figure 4**

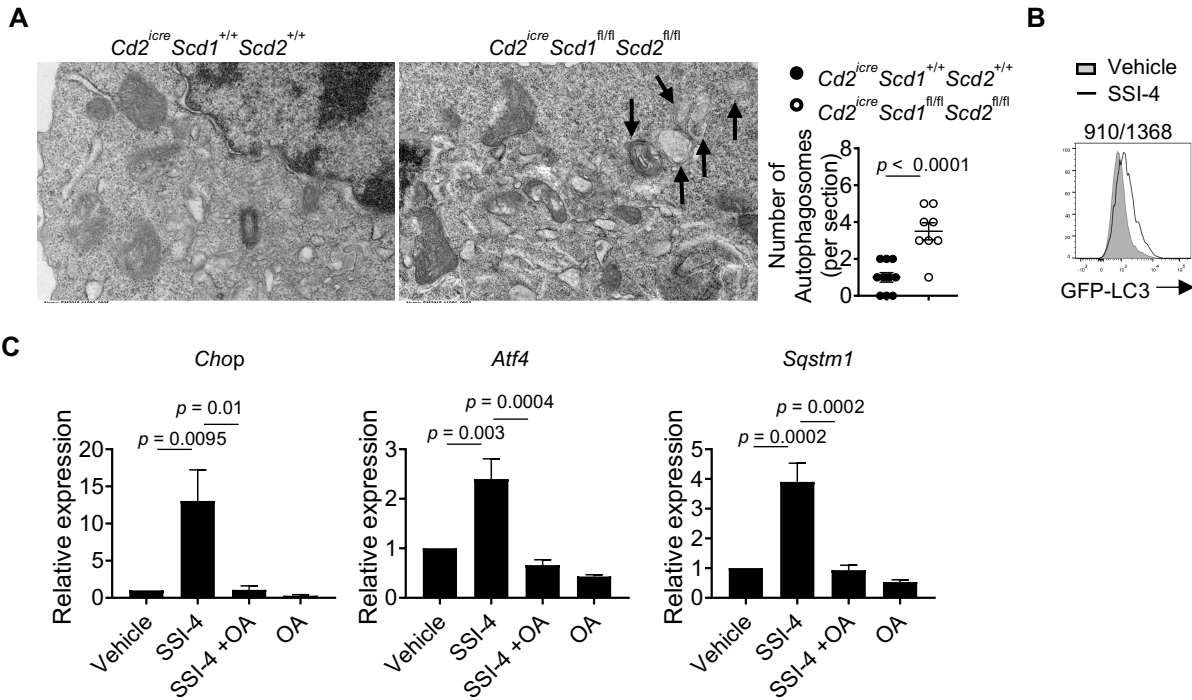

**Figure S4. MUFAs prevent overactivation of autophagy and ER stress, related to Figure 4**  
 (A) B cells isolated from  $Cd2^{iCre} Scd1^{+/+} Scd2^{+/+}$  and  $Cd2^{iCre} Scd1^{fl/fl} Scd2^{fl/fl}$  mice were activated with LPS/IL-4 for 48 h. They were imaged on transmission electron microscope. Right, numbers of autophagosomes (per section) found in B cells from  $Cd2^{iCre} Scd1^{+/+} Scd2^{+/+}$  mouse ( $n = 10$ ) and those from  $Cd2^{iCre} Scd1^{fl/fl} Scd2^{fl/fl}$  mouse ( $n = 8$ ). (B) Flow cytometry analysis of GFP-LC3 expression in activated B cells isolated from GFP-LC3 reporter mouse treated with vehicle, and SSI-4. Numbers indicate the mean fluorescence intensity (MFI) of GFP. (C) RT-PCR analysis of *Chop*, *Atf4*, and *Sqstm1* in activated B cells in the presence of vehicle, SSI-4, SSI-4 plus OA, or OA alone.  $p$  value was calculated with Student  $t$ -test (A) and one-way ANOVA (C). Data were representative of 2 (A, B) experiments, or were pooled from 3 (C) independent experiments. Error bars represent SEM.

**Figure S5, related to Figure 5**

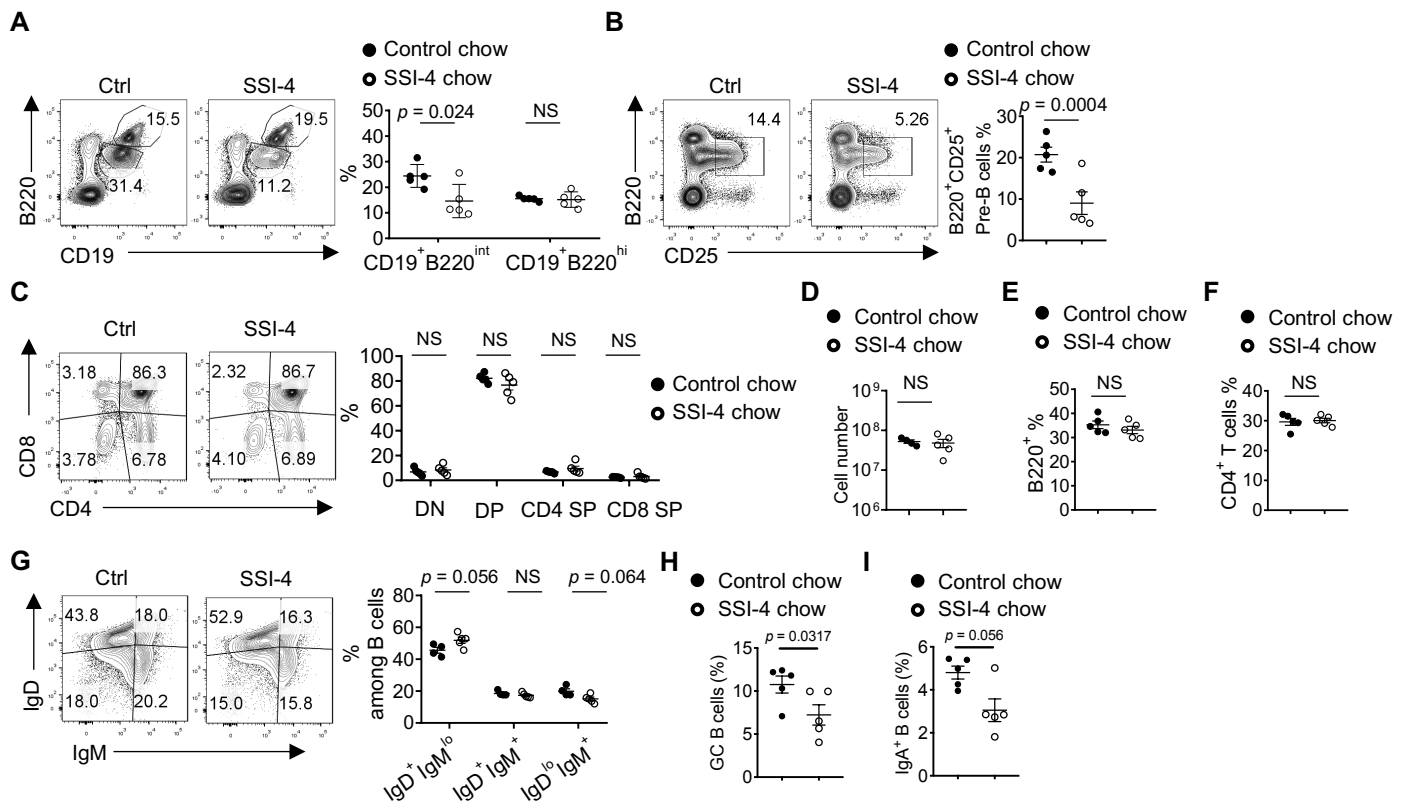

**Figure S5. SCD activity supports B cell development and immunization induced humoral immune response, related to Figure 5**

(A) Flow cytometry analysis of B cell precursors (B220<sup>int</sup>CD19<sup>+</sup>) and circulating mature B cells (B220<sup>hi</sup>CD19<sup>+</sup>) in bone marrow from mice fed with control chow or SSI-4 chow. Right, frequencies of B cell precursors and circulating mature B cells. (B) Flow cytometry of pre-B cell (B220<sup>+</sup>CD25<sup>+</sup>) in bone marrow from mice fed with control chow or SSI-4 chow. Right, frequencies of pre-B cells. (C) Flow cytometry analysis of thymic CD4<sup>-</sup>CD8<sup>-</sup> (DN), CD4<sup>+</sup>CD8<sup>+</sup> (DP), CD4<sup>+</sup> single positive (SP) and CD8<sup>+</sup> SP T cells from mice fed with control chow or SSI-4 chow. Right, the frequencies of DP, DN, CD4<sup>+</sup> and CD8<sup>+</sup> SP T cells. (D-F) Mice were fed with control chow or SSI-4 chow for 2 weeks. The total splenic cellularity (D), and percentages of splenic B220<sup>+</sup> B cells (E), and CD4<sup>+</sup> T cells (F). (G) Flow cytometry analysis of IgM<sup>lo</sup>IgD<sup>+</sup> (mature B), IgM<sup>+</sup>IgD<sup>+</sup>, and IgM<sup>+</sup>IgD<sup>lo</sup> B cells among splenic CD19<sup>+</sup> B cells. Right, the frequencies of each B cell subsets. (H, I) The frequencies of GC B cells (H) and IgA expression (I) among total B cells in Peyer's patches from mice fed with control or SSI-4 chow. *p* value was calculated with Student *t*-test (A-I). Data were representative of 2 (A-I) independent experiments. Error bars represent SEM.

## Figure S6, related to Figure 7

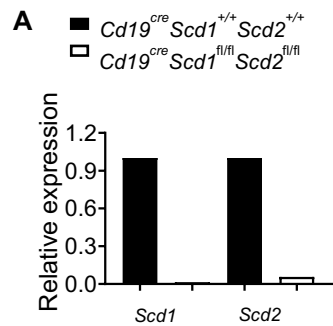

## Figure S6. B cell intrinsic SCD activity is dispensable for humoral immunity *in vivo*, related to Figure 7

(A) RT-PCR analysis of *Scd1*, and *Scd2* expression in murine splenic B cells isolated from WT and  $Cd19^{Cre}Scd1^{fl/fl}Scd2^{fl/fl}$  mice.

**Table S1. The concentrations of non-esterified free fatty acids (NEFA) were measured in 8 weeks old male (n = 5) and female (n = 8) mice sera, related to Figure 2**

| Non-esterified free fatty acids (NEFA) | Concentration ( $\mu\text{M}$ , Mean $\pm$ SD) |                 |
|----------------------------------------|------------------------------------------------|-----------------|
|                                        | Male (n = 5)                                   | Female (n = 8)  |
| EPA                                    | 3.08 $\pm$ 0.83                                | 4.44 $\pm$ 0.56 |
| Linolenic acid                         | 26.3 $\pm$ 3.74                                | 44.6 $\pm$ 12.7 |
| DHA                                    | 18.6 $\pm$ 2.94                                | 23 $\pm$ 3.5    |
| Myristic acid                          | 5.69 $\pm$ 1.2                                 | 7.55 $\pm$ 2.17 |
| Palmitoleic acid                       | 32.8 $\pm$ 2.543                               | 31.7 $\pm$ 5.53 |
| Arachidonic acid                       | 10.1 $\pm$ 0.77                                | 14.8 $\pm$ 1.24 |
| Linoleic acid                          | 221 $\pm$ 20.1                                 | 304 $\pm$ 74    |
| Palmitic acid                          | 222 $\pm$ 5.97                                 | 239 $\pm$ 26.1  |
| Oleic acid                             | 162 $\pm$ 18.2                                 | 184 $\pm$ 37.9  |
| Stearic acid                           | 44.7 $\pm$ 5.01                                | 53.8 $\pm$ 8.39 |

**Table S2. Primers for RT-PCR are listed below, related to STAR Methods**

| <b>Gene names</b> | <b>Species</b> | <b>Sequences</b>                                                      |
|-------------------|----------------|-----------------------------------------------------------------------|
| <i>Scd1</i>       | Murine         | F 5'-TTCTTGCGATACACTCTGGTGC-3'<br>R 5'-CGGGATTGAATGTTCTTGTCGT-3'      |
| <i>Scd2</i>       | Murine         | F 5'-GCATTTGGGAGCCTTGACG-3'<br>R 5'-AGCCGTGCCTTGATGTTCTG-3'           |
| <i>Fasn</i>       | Murine         | F 5'-GGAGGTGGTGATAGCCGGTAT-3'<br>R 5'-TGGTAATCCATAGAGCCCAG-3'         |
| <i>Acaca</i>      | Murine         | F 5'-GTCCCCAGGGATGAACCAATA-3'<br>R 5'-GCCATGCTCAACCAAAGTAGC-3'        |
| <i>Chop</i>       | Murine         | F 5'-CTGGAAGCCTGGTATGAGGAT-3'<br>R 5'-CAGGGTCAAGAGTAGTGAAGGT-3'       |
| <i>Atf4</i>       | Murine         | F 5'-GGGTTCTGTCTTCCACTCCA-3'<br>R 5'-AAGCAGCAGAGTCAGGCTT-3'           |
| <i>Sqstm1</i>     | Murine         | F 5'-AGGATGGGGACTTGGTTGC-3'<br>R 5'-TCACAGATCACATTGGGGTGC-3'          |
| <i>SCD</i>        | Human          | F 5'-AGTTCTACACCTGGCTTTGG-3'<br>R 5'-GTTGGCAATGATCAGAAAGAGC-3'        |
| <i>ACACA</i>      | Human          | F 5'-GATATCCCAGAGATGTTTCGGC-3'<br>R 5'-GTCAGCATGTCAGAAGGCAGAG-3'      |
| <i>FASN</i>       | Human          | F 5'-AGAACTTGACAGGAGTTCTGGGACA-3'<br>R 5'-TCCGAAGAAGGAGGCATCAAACCT-3' |
